# Supplementary material for: Using the extended self-regulatory model to characterise diabetes medication adherence: a cross-sectional study
Source: PubMed Central journal article supplement — BMJ Open. 2018 Nov 25;8(11):e022803. doi: 10.1136/bmjopen-2018-022803 (PMC6254403; doi:10.1136/bmjopen-2018-022803), 2018-11-25
Supplement: bmjopen-2018-022803.draft_revisions.pdf [file bmjopen-2018-022803.draft_revisions.pdf]

# BMJ Open

BMJ Open is committed to open peer review. As part of this commitment we make the peer review history of every article we publish publicly available.

When an article is published we post the peer reviewers' comments and the authors' responses online. We also post the versions of the paper that were used during peer review. These are the versions that the peer review comments apply to.

The versions of the paper that follow are the versions that were submitted during the peer review process. They are not the versions of record or the final published versions. They should not be cited or distributed as the published version of this manuscript.

BMJ Open is an open access journal and the full, final, typeset and author-corrected version of record of the manuscript is available on our site with no access controls, subscription charges or pay-per-view fees (<http://bmjopen.bmj.com>).

If you have any questions on BMJ Open's open peer review process please email [editorial.bmjopen@bmj.com](mailto:editorial.bmjopen@bmj.com)

# BMJ Open

## Utilizing the Extended Self-Regulatory Model to Characterize Diabetes Medication Adherence: A Cross-Sectional Study

|                               |                                                                                                                                                                                                                                                                                                                                                                                               |
|-------------------------------|-----------------------------------------------------------------------------------------------------------------------------------------------------------------------------------------------------------------------------------------------------------------------------------------------------------------------------------------------------------------------------------------------|
| Journal:                      | <i>BMJ Open</i>                                                                                                                                                                                                                                                                                                                                                                               |
| Manuscript ID                 | bmjopen-2018-022803                                                                                                                                                                                                                                                                                                                                                                           |
| Article Type:                 | Research                                                                                                                                                                                                                                                                                                                                                                                      |
| Date Submitted by the Author: | 27-Mar-2018                                                                                                                                                                                                                                                                                                                                                                                   |
| Complete List of Authors:     | Shiyanbola, Olayinka; University of Wisconsin Madison School of Pharmacy, Social and Administrative Sciences<br>Unni, Elizabeth; Roseman University of Health Sciences,<br>Huang, Yen-ming; University of Wisconsin Madison School of Pharmacy, Social and Administrative Sciences<br>Lanier, Cameron; University of Wisconsin Madison School of Pharmacy, Social and Administrative Sciences |
| Keywords:                     | Medication adherence, Beliefs in Medicines, Illness Perceptions, Diabetes medicines, Clustering                                                                                                                                                                                                                                                                                               |
|                               |                                                                                                                                                                                                                                                                                                                                                                                               |

SCHOLARONE™  
Manuscripts

Peer Review Only

1  
2  
3 **Utilizing the Extended Self-Regulatory Model to Characterize Diabetes Medication**  
4 **Adherence: A Cross-Sectional Study**  
5  
6  
7

8 Olayinka O Shiyabola,<sup>1</sup> Elizabeth Unni,<sup>2</sup> Yen-Ming Huang,<sup>1</sup> Cameron Lanier<sup>1</sup>  
9

10  
11  
12 <sup>1</sup> Division of Social and Administrative Sciences, School of Pharmacy, University of Wisconsin-  
13 Madison, Wisconsin, USA  
14

15  
16  
17  
18 <sup>2</sup> Department of Pharmaceutical Sciences, College of Pharmacy, Roseman University of Health  
19 Sciences, Utah, USA  
20  
21

22  
23  
24 Corresponding Author: Olayinka O. Shiyabola; Division of Social and Administrative Sciences,  
25 School of Pharmacy, University of Wisconsin-Madison, 777 Highland Avenue Madison, WI  
26 53705, USA (e-mail: Olayinka.Shiyabola@wisc.edu)  
27  
28  
29

30  
31  
32 References: 50  
33

34  
35  
36 Table: 2  
37

38  
39 Words count: 3848  
40

41  
42 Abstract: 300  
43  
44

45  
46 Keywords: Medication Adherence, Beliefs in Medicines, Illness Perceptions, Type 2 diabetes,  
47 Clustering  
48  
49

1  
2  
3 **Objectives:** To cluster the adherence behaviors of patients with type 2 diabetes based on their  
4 beliefs in medicines and illness perceptions and examine the psychosocial, clinical and socio-  
5 demographic characteristics of patient clusters.  
6  
7

8  
9  
10 **Design:** Cross-sectional study  
11

12 **Setting:** A face-to-face survey was administered to patients in two family medicine clinics in the  
13 Midwest, USA.  
14

15  
16 **Participants:** One hundred and seventy four English-speaking  $\geq 20$  years old adult patients with  
17 type 2 diabetes who were prescribed at least one oral diabetes medicine daily were recruited  
18 using convenience sampling.  
19  
20  
21

22  
23 **Primary and secondary outcome measures:** Beliefs in medicines and illness perceptions were  
24 assessed using the Beliefs about Medicines Questionnaire and the Brief Illness Perceptions  
25 Questionnaire respectively. Self-reported medication adherence was assessed using the Morisky  
26 Medication Adherence Scale. Psychosocial correlates of adherence, health literacy and self-  
27 efficacy, were measured using the Newest Vital Sign and the Self-efficacy for Appropriate  
28 Medication Use respectively. Two-step cluster analysis was used to classify patients.  
29  
30  
31

32  
33 **Results:** Participants' mean age was 58.74 (SD = 12.84). The majority were female (57.5%).  
34  
35 Four clusters were formed (ambivalent, skeptical (non-adherent clusters), indifferent, and  
36 accepting (adherent clusters)). The ambivalent cluster (n = 30, 17.2%) included low adherent  
37 patients with high necessity beliefs, high concern beliefs, and high illness perceptions. The  
38 skeptical cluster (n = 53, 30.5%) included low adherent patients with low necessity beliefs, but  
39 high concern beliefs and high illness perceptions. Both the accepting (n = 40, 23.0%) and  
40 indifferent (n = 51, 29.3%) clusters were comprised of patients with high adherence. Significant  
41 differences between the ambivalent, skeptical, accepting and indifferent adherent clusters were  
42  
43  
44  
45  
46  
47  
48  
49  
50  
51  
52  
53  
54  
55  
56  
57  
58  
59  
60

1  
2  
3 based on self-efficacy, illness perception domains (treatment control, coherence), and  
4  
5 hemoglobin A1c ( $p < 0.01$ ).  
6

7  
8 **Conclusions:** Patients with diabetes in specific non-adherent and adherent clusters still have  
9  
10 distinct beliefs as well as psychosocial characteristics that may help providers target tailored  
11  
12 medication adherence interventions.  
13

### 14 15 16 **Strengths and limitations of this study**

- 17  
18 • This is the first study to use a clustering technique to allow for algorithm-based grouping  
19  
20 based on both beliefs in medicines and illness perceptions founded on the Extended Self-  
21  
22 Regulatory Model among patients with diabetes.  
23
- 24  
25 • This study highlighted the importance of content and theory-driven components to enable  
26  
27 replication of successful adherence interventions.  
28
- 29  
30 • This study focused on the impact of patient psychosocial factors such as their individual  
31  
32 perceptions of medication and illness, self-efficacy, and health literacy in the  
33  
34 management of diabetes.  
35
- 36  
37 • Convenience sample from two clinics in one state, hereby limiting the generalizability of  
38  
39 the study.  
40
- 41  
42 • The use of a self-reported measure to evaluate medication adherence, rather than  
43  
44 objective measures.  
45  
46  
47  
48

49 **Funding statement:** This research received no specific grant from any funding agency in the  
50  
51 public, commercial or not-for-profit sectors.  
52

53 **Competing Interests:** The authors have no competing interests.  
54  
55  
56  
57  
58  
59

1  
2  
3 **Author Contributors:** OOS and EU designed the study. OOS, YH, and CL were involved in  
4 data collection and data analysis. OOS wrote the manuscript and EU and YM critically revised  
5 the content. All authors approved the final version of the manuscript.  
6  
7

8  
9  
10 **Patient Consent:** Obtained

11  
12 **Acknowledgement:** The authors would like to thank Dr. Paul Smith for helping with part of the  
13 study's data collection process. Use of the ©MMAS is protected by US and International  
14 copyright laws. Permission for use is required. A license agreement is available from: Donald E.  
15 Morisky, MMAS Research (MORISKY) 16636 159th Place SE, Renton WA 98058,  
16 [dmorisky@gmail.com](mailto:dmorisky@gmail.com). We have obtained written permission from copyright owners for any  
17 excerpts from copyrighted works that are included and have credited the sources in the article or  
18 the supplemental materials.  
19  
20  
21  
22  
23  
24  
25  
26  
27

28 **Ethical approval:** The Health Sciences Institutional Review Board of the University of  
29 Wisconsin-Madison.  
30  
31

32  
33 **Data sharing statement:** No additional data are available.  
34  
35  
36  
37  
38  
39  
40  
41  
42  
43  
44  
45  
46  
47  
48  
49  
50  
51  
52  
53  
54  
55  
56  
57  
58  
59  
60

## Introduction

Medication adherence, defined as the extent to which taking medications corresponds with recommendations by a healthcare provider is essential for treatment success.<sup>1</sup> Poor adherence results in increased risk of mortality, increased emergency room visits, and reduced quality of life.<sup>2-5</sup> In general, rates of medication adherence are below 50%.<sup>6</sup> However, for patients with type 2 diabetes, these rates are as low as 36%.<sup>7</sup> It is estimated that a 10% improvement in diabetes medication adherence would lead to at least a 6.6% reduction in hospitalizations.<sup>7</sup>

Among patients with diabetes, medication adherence has been found to be influenced by psychosocial factors, such as beliefs about illness and treatment, self-efficacy and perceived control, self-regulation, and emotional states.<sup>8</sup> However, the sparse studies on patients with diabetes has generated inconsistent results and does not indicate which factors mainly affect medication adherence.<sup>8-10</sup> Of the various factors that influence medication adherence, Horne and Weinman (2002) showed that socio-demographic and clinical factors explain only a small amount of variance in medication adherence, whereas illness perceptions and patient beliefs in medicines are substantial independent predictors.<sup>11</sup> Since patient clinical and sociodemographics are difficult to change, it makes sense to focus on patient factors that are modifiable, practical for intervention, and can be addressed by health providers.

Studies based on the Extended Self-Regulatory Model show that when patients are diagnosed with an illness, they develop a pattern of beliefs about their condition and treatment, which then influences their medication adherence.<sup>12-17</sup> The Self-Regulatory Model (also called the Common Sense Model) was developed to explain illness-related coping behaviors including adherence to treatment, based on patient perceptions of their illness.<sup>18</sup> When research identified beliefs about treatment as proximal determinants of coping strategies such as medication

1  
2  
3 adherence compared with illness perceptions, Horne et al. extended the Self-Regulatory Model  
4 by integrating beliefs about treatment into the original model.<sup>11,12</sup> In prior research, Phillips and  
5  
6 colleagues suggested that patient adherence was greater when illness and treatment perceptions  
7  
8 were addressed or discussed during patients' medical encounter and that healthcare providers  
9  
10 were better able to judge patient agreement regarding the illness and treatment when patients  
11  
12 reported these discussions occurred.<sup>19,20</sup>  
13  
14  
15

16  
17 To design feasible and useful medication adherence interventions, Horne et al originally  
18  
19 classified patients with chronic illnesses into four attitudinal groups (accepting, ambivalent,  
20  
21 skeptical, and indifferent) based on their beliefs about their treatment.<sup>21</sup> While "accepting"  
22  
23 patients, with high necessity beliefs and low concerns had the highest medication adherence,  
24  
25 "skeptical" patients, with low perceived need of medications and high concerns, had the lowest  
26  
27 adherence levels. Other patient groups, the "ambivalent" (high necessity beliefs and high  
28  
29 concerns), and the "indifferent" (low necessity beliefs and low concerns) were also likely to be  
30  
31 non-adherent. Though medication non-adherence is a common problem among patients with  
32  
33 chronic illnesses, they hardly discuss this behavior with their health providers during routine  
34  
35 visits.<sup>22</sup> Various available tools used to identify medication adherence are not usable in clinical  
36  
37 consultations because of the short time available to providers.<sup>23</sup> Hence, clustering patients'  
38  
39 adherence behavior based on their beliefs may provide a mechanism for providers to focus on the  
40  
41 specific belief needs of the patients in the context of their psychosocial characteristics. A  
42  
43  
44 previous study based on the Extended Self-Regulatory Model used both illness perceptions and  
45  
46 beliefs in medicines to cluster patients with asthma and was able to develop the same clusters as  
47  
48 developed by Horne et al.<sup>24</sup> Additionally, each cluster had psychosocial characteristics that was  
49  
50  
51  
52  
53  
54  
55  
56  
57  
58  
59  
60



1  
2  
3 unique to them. However, further studies were needed to determine whether the four attitudinal  
4  
5 group structure that includes illness perceptions also holds with other chronic disease conditions.  
6  
7

8 The objectives of this study were to:

- 9  
10 1) Cluster the adherence behaviors of patients with type 2 diabetes based on their beliefs in  
11  
12 medicines and illness perceptions.  
13  
14 2) Examine the psychosocial, clinical and sociodemographic characteristics of patient clusters.  
15  
16

17 This study hypothesized that patient clusters with high concern beliefs and low necessity  
18  
19 beliefs will also have high threatening illness perceptions, and groups with low concern beliefs  
20  
21 and high necessity beliefs will have low threatening illness perceptions.  
22  
23

## 24 **Methods**

25  
26 Using a cross-sectional study design, a face-to-face survey was administered to English-speaking  
27  
28  $\geq 20$  years old patients with type 2 diabetes who were prescribed at least one oral diabetes  
29  
30 medicine daily. Patients were recruited using convenience sampling. Information on eligible  
31  
32 patients were retrieved from the electronic health record database of two family medicine clinics  
33  
34 in a Midwestern state in the United States.  
35  
36

### 37 *Data collection*

38  
39 Front desk receptionist at the two clinics provided study information sheets to eligible patients  
40  
41 who were waiting for their appointment. After patients reviewed the information, they met with a  
42  
43 research assistant to indicate their interest in participating. The research assistant verified the  
44  
45 patient's eligibility from the clinic's patient log, administered the informed consent form, and  
46  
47 completed the 20-30 minutes survey with the consented participant in a private area in the clinic.  
48  
49 Participants were allowed to complete the survey before or after their scheduled clinic  
50  
51 appointments, depending on clinic flow and their preferences. Informed consent was obtained  
52  
53  
54  
55  
56  
57  
58  
59  
60

1  
2  
3 from all individual participants included in the study. All data collection occurred from March  
4  
5 2016 to August 2016. Patients were compensated with \$25 cash, upon completion of the survey.  
6  
7  
8 The University Health Sciences Institutional Review Board approved the study.  
9

### 10 *Measures*

11  
12 Self-reported medication adherence was assessed using the 8-item Morisky Medication  
13  
14 Adherence Scale (MMAS-8), a widely used scale in patients with diabetes.<sup>25-29</sup> The total score  
15  
16 of the MMAS-8 ranged from 0 to 8 and MMAS-8 scores of < 6, 6 to < 8, and 8 reflected low,  
17  
18 medium, and high medication adherence, respectively.<sup>26</sup> The 10-item Beliefs in Medicines  
19  
20 Questionnaire (BMQ) was used to measure patient beliefs in medications.<sup>30</sup> The BMQ includes  
21  
22 the necessity beliefs and concern beliefs sub-scales measured on five-point Likert-type scales  
23  
24 with ‘strongly disagree’ to ‘strongly agree’ response options.<sup>30</sup> The range of scores for each sub-  
25  
26 scale is 5-25, with a higher score meaning stronger concern beliefs or stronger necessity beliefs  
27  
28 about the medicine. The 8-item Brief-Illness Perceptions Questionnaire (B-IPQ) was used to  
29  
30 measure patients’ perceptions about diabetes.<sup>31</sup> This validated instrument includes survey items  
31  
32 assessing patient illness perceptions about diabetes along the cognitive domains of the self-  
33  
34 regulatory model as well as their emotional responses to having diabetes.<sup>31</sup> Each survey item of  
35  
36 the B-IPQ was assessed on a scale of 0-10 with higher scores indicating stronger threatening  
37  
38 perceptions along the illness perception dimensions.  
39  
40  
41  
42  
43

44  
45 Finally, we assessed other patient psychosocial correlates of medication adherence, i.e.  
46  
47 health literacy and self-efficacy. Health literacy assessed using the 6-item Newest Vital Sign  
48  
49 (NVS)<sup>32,33</sup> has been extensively used across studies including patients with type 2 diabetes and  
50  
51 can be completed in a short time (3-5minutes).<sup>34,35</sup> Each question was scored as “0” for an  
52  
53 incorrect response and “1” for a correct response for a total score of 0 to 6. Patients with scores  
54  
55  
56  
57  
58  
59  
60

1  
2  
3 less than 2 represented a high likelihood of inadequate health literacy, 2 to 3 indicated the  
4 possibility of marginal health literacy, and more than 3 suggested adequate health literacy.  
5  
6

7  
8 Self-efficacy measured using the 13-item Self-efficacy for Appropriate Medication Use  
9 Scale (SEAMS) was used in examining medication self-efficacy in chronic disease management,  
10 and is appropriate regardless of patient literacy skills.<sup>36,37</sup> Patients indicated under a range of  
11 situations, their level of confidence regarding taking medications correctly using a 3-point Likert  
12 scale (1 = not confident, 2 = somewhat confident, and 3 = very confident). The total score of the  
13 SEAMS ranged from 13 to 39 with higher scores indicating more confidence in adhering to  
14 medication use.<sup>36</sup>  
15  
16  
17  
18  
19  
20  
21  
22  
23

24 Other variables included sociodemographic factors such as age, gender, highest education  
25 level, race, health insurance, and the annual household income level; patient clinical factors such  
26 as the number of chronic illnesses, self-reported health status, number of medications used,  
27 frequency of daily diabetes medication use, duration of diagnosis of type 2 diabetes, and whether  
28 the patient used insulin or not. Besides the main predictor variables, patients' hemoglobin A1c  
29 (HbA1c) values in the prior six months were retrieved from electronic medical records, with  
30 lower HbA1c values  $\leq 7.0\%$  representing better glycemic control. The average duration between  
31 the day of the latest HbA1c testing and the day of patient completing the survey was  $43.3 \pm 84.6$   
32 days (median: 7 days).  
33  
34  
35  
36  
37  
38  
39  
40  
41  
42  
43

#### 44 *Data analysis*

45  
46 A two-step cluster analysis was used to classify patients' medication adherence behavior based  
47 on their beliefs in medicines and illness perceptions. The number of clusters to be formed was  
48 kept a priori at four, a number determined by the researchers based on Horne's earlier studies  
49 and our prior work.<sup>21,24,38-40</sup> The cluster analysis technique organizes observed data (e.g. patients)  
50  
51  
52  
53  
54  
55  
56  
57  
58  
59  
60

1  
2  
3 into meaningful groups or clusters based on combinations of the independent variables. This  
4  
5 process maximizes the similarity of cases within each cluster but also maximizes the  
6  
7 dissimilarity between the groups based on the log-likelihood distance between the data points.  
8  
9  
10 Using this method allows the clusters to be created without a preconceived notion of what the  
11  
12 clusters may look like. In the first step, each data record was either considered as a new cluster or  
13  
14 was added to a previously formed cluster. In the second step, the clusters formed from the first  
15  
16 step were compared and merged based on the distance between them. Then, we assessed the  
17  
18 goodness of fit of the clustering solution. The silhouette measure of cohesion and separation was  
19  
20 used to evaluate the overall goodness-of-fit of the clusters.<sup>41</sup> A silhouette measure varies  
21  
22 between -1 and 1 based on the average distances between the objects. The value of a silhouette  
23  
24 measure less than 0.20 indicates a poor solution quality, a value between 0.20 and 0.50 suggests  
25  
26 a fair solution, whereas a value of more than 0.50 represents a good solution.<sup>42</sup> Once categorized,  
27  
28 the clusters were then characterized based on various sociodemographic and clinical  
29  
30 characteristics. For the continuous variables, one-way ANOVA was used to determine the  
31  
32 psychosocial (health literacy and self-efficacy), clinical (e.g. number of medicines) and socio-  
33  
34 demographic (e.g. age) factors that varied between the clusters. For the categorical variables such  
35  
36 as gender and race, chi-square tests were used to examine the differences between the clusters.  
37  
38  
39  
40  
41  
42 SPSS version 23 was used for all the analyses.  
43

#### 44 *Patient and Public involvement*

45  
46 No patients were involved in the study design, development of the research questions and  
47  
48 outcome measures, recruitment, or implementation. The results of the study will be disseminated  
49  
50 to study participants through access to the published article once published in the journal.  
51  
52  
53  
54  
55  
56  
57  
58  
59  
60

## Results

One hundred and ninety-nine patients were approached and 174 patients participated (87.4% response rate). The participant's mean age was 58.74 (SD = 12.84). The majority were female (57.5%), non-Hispanic white (67.8%) and African American (24.7%). Approximately 62.1% had completed at least a college or technical degree, and 57.5% had an annual household income of equal or more than \$20,000. Of the 174 patients, 40.8% had low medication adherence, 35.1% had medium medication adherence, and 24.1% had high medication adherence.

The two-step cluster analysis produced four distinctive clusters categorized as ambivalent, skeptical, indifferent, and accepting. The characteristics of the clusters based on medication adherence, beliefs in medicines, illness perceptions, health literacy, self-efficacy, and all demographics are reported in Table 1. The distribution of participants across the clusters ranged from 17.2% to 30.5%. The silhouette measure was 0.4 which indicated a satisfactory cluster quality and the ratio of the largest to smallest cluster was acceptable at 1.77. As hypothesized, high concern beliefs was related to high threatening illness perceptions and low adherence and vice versa. Table 2 describes the distinctive psychosocial and clinical characteristics of each cluster. The ambivalent cluster (n = 30, 17.2%) included low adherent patients with high necessity beliefs, high concern beliefs, and high illness perceptions. The skeptical cluster (n = 53, 30.5%) included low adherent patients with low necessity beliefs, but high concern beliefs and high illness perceptions. Both the accepting (n = 40, 23.0%) and indifferent (n = 51, 29.3%) clusters were comprised of patients with high adherence. Significant differences were found between the ambivalent, skeptical, accepting and indifferent adherent clusters based on self-efficacy (p = 0.002), beliefs in medicines (p < 0.001), illness perception domains (consequence (p < 0.001), personal control (p < 0.001), treatment control (p < 0.001), identity (p < 0.001),

1  
2  
3 concern ( $p < 0.001$ ), coherence ( $p = 0.027$ ), and emotional representations ( $p < 0.001$ ), and  
4  
5 hemoglobin A1c ( $p < 0.05$ ) (Table 1). While non-adherent clusters had low self-efficacy and  
6  
7 high HbA1c levels, it was vice versa for the adherent clusters. Patients in the ambivalent non-  
8  
9 adherent cluster were younger in age compared to those in the adherent clusters, less likely to  
10  
11 have attended some college or technical school, and likely to be non-white.  
12  
13

## 14 **Discussion**

15  
16 This study used the Extended Self-Regulatory Model to cluster the adherence behavior of  
17  
18 patients with type 2 diabetes based on beliefs in medicines and illness perceptions, as well as  
19  
20 examine the characteristics of the clusters and the significant differences between them. Four  
21  
22 clusters with distinct beliefs and psychosocial characteristics associated with each group were  
23  
24 formed. The adherence clusters developed in this study by using both beliefs in medicines and  
25  
26 illness perceptions are similar to the clusters formed by Horne et al in his previous studies where  
27  
28 only beliefs in medicines were used. By including illness perceptions and other psychosocial  
29  
30 correlates of adherence, this study identified other pertinent information related to each cluster  
31  
32 that may help in developing guided and targeted interventions for providers working with  
33  
34 diabetes patients who may be non-adherent.  
35  
36  
37  
38  
39

40 Patients in the ambivalent cluster were the least adherent to their medicines followed by  
41  
42 the skeptical cluster. These clusters together comprised 48% of the whole sample. These results  
43  
44 are similar to previous studies where these specific clusters represent the non-adherent  
45  
46 proportion of a sample.<sup>21,24</sup> Contrary to a prior study<sup>39</sup>, ambivalent patients had the lowest  
47  
48 adherence to diabetes medicines, the strongest concerns about their medicines and the strongest  
49  
50 threatening illness perceptions. In spite of their strong concerns about medicines, ambivalent  
51  
52 patients also perceived that their medications were necessary to maintain their health. Further  
53  
54  
55  
56  
57  
58  
59  
60

1  
2  
3 analysis revealed that their strong threatening perceptions about diabetes were from their  
4 individual illness perception domains including high emotional representations, lack of treatment  
5 control, high concern about illness, less coherence, and experiencing many severe symptoms due  
6 to diabetes. Despite the belief that medications are necessary, patients in the ambivalent cluster  
7 may be cognitively and emotionally overwhelmed with the demands of managing diabetes.  
8  
9  
10  
11  
12  
13  
14  
15  
16  
17  
18  
19  
20  
21  
22  
23  
24  
25  
26  
27  
28  
29  
30  
31  
32  
33  
34  
35  
36  
37  
38  
39  
40  
41  
42  
43  
44  
45  
46  
47  
48  
49  
50  
51  
52  
53  
54  
55  
56  
57  
58  
59  
60

Diabetes is psychologically demanding and requires adaptive self-care tasks related to being chronically ill, including taking medications as prescribed.<sup>43-45</sup> Because of this, when patients fail to self-manage their disease, it may give rise to feelings of guilt, frustration, anger, and hopelessness. These negative feelings may foster a pessimistic attitude towards diabetes, leading to negative beliefs about the illness and medication, and poor medication adherence.<sup>46</sup>

Ambivalent patients in this study also had the least self-confidence that they could take and manage their medications correctly and had the lowest health literacy scores. These patients also took the highest number of medicines, had the highest number of chronic illness, and had poor glycemic control (highest hemoglobin A1c values). In addition, ambivalent patients were the youngest among the four clusters and had the least education which might account for their inadequate health literacy and concerns about illnesses and medicines. Tailored adherence interventions aimed at these patients may need to build their self-efficacy and address their low health literacy. Prior research shows that by providing information in simple plain language, using teach-back techniques, and showing patients how they can be expert self-managers and engage in self-monitoring; patients are more likely to feel more in control of their illness, less concerned about the illness, and manage their illness more effectively.<sup>47</sup>

In the skeptical cluster, patients had strong concerns about medicines and threatening illness perceptions, although not at a pronounced degree as the ambivalent group. They also did

1  
2  
3 not think their medications were necessary. Contrary to previous studies in asthma, epilepsy,  
4 inflammatory bowel disease, depression and cardiac disease, where the skeptical groups were  
5 most non-adherent to their medications<sup>24,39,40</sup>, the skeptical group of patients with diabetes in  
6 this study did not have the lowest medication adherence. Though this cluster of patients had  
7 perceptions of strong consequences from the illness, lack of treatment control, high concerns,  
8 high emotional representations, less understanding of their illness, were experiencing many  
9 symptoms due to diabetes, and were not confident they could manage their medications; they  
10 also had high health literacy. For these patients, it is possible that because they have an increased  
11 ability to search, understand, and process health information; they are engaged in seeking  
12 information to manage their diabetes themselves, perform other diabetes self-management  
13 practices, and therefore do not believe they need medicines. A prior study has shown that  
14 patients with no educational qualifications (possibly tied to health literacy) are likely to have  
15 doubts about their personal need for medicines compared with patients with any formal  
16 educational qualifications.<sup>40</sup> Additionally, their self-perceived better health status may also be  
17 contributing to their perception that medications are not necessary for maintaining their health,  
18 hence, making them skeptical. In spite of their high health literacy, skeptical patients' low self-  
19 efficacy may lead to their poor glycemic control especially as prior studies report the strong  
20 influence of self-efficacy on diabetes control.<sup>48,49</sup> Adherence interventions that target concerns  
21 about medicines and illness, but also aim to motivate patients towards medication use might need  
22 to be developed for these group of patients.

23  
24  
25  
26  
27  
28  
29  
30  
31  
32  
33  
34  
35  
36  
37  
38  
39  
40  
41  
42  
43  
44  
45  
46  
47  
48  
49 Patients in the indifferent and accepting clusters were adherent to their medicines, though  
50 different in their beliefs in medicines. Similar to prior studies<sup>21,24,39,40</sup>, patients in the accepting  
51 group were more likely to be adherent to their medicines. These patients are generally not  
52  
53  
54  
55  
56  
57  
58  
59  
60



1  
2  
3 concerned about their illness, believe that their medications are necessary and are least concerned  
4 about them, feel the most confident that they can take their medications correctly, and have the  
5 ability to process and understand health information. This group of patients however still believe  
6 that their diabetes affects their life, and still have some concern about it. The accepting patients  
7 were the oldest in age, the most educated, and have had their diabetes longer compared to  
8 patients in other clusters. Since these patients' HbA1c values still show that their diabetes is  
9 uncontrolled and using medications as part of diabetes management may not be concerning;  
10 interventions may seek to address concerns about their diabetes, especially as it relates to other  
11 complex diabetes self-management issues such as checking blood sugars, exercising, and diet etc.  
12 Since these older and well educated patients have had diabetes for a long time and use a lot of  
13 medications, providers may continue to encourage self-monitoring of symptoms, adverse drug  
14 events, and check for other indicators of poor diabetes outcomes such as high blood pressure and  
15 high cholesterol.<sup>50</sup>

16  
17  
18  
19  
20  
21  
22  
23  
24  
25  
26  
27  
28  
29  
30  
31  
32  
33 Contrary to previous studies<sup>21,24</sup> where patients who were in the indifferent cluster were  
34 reported to be non-adherent to their medicines, the current study showed that the patients in this  
35 cluster were adherent to their medicines and their diabetes seemed to be in better control than  
36 patients in the three other clusters. Though the patients in the indifferent cluster were the least  
37 likely to believe that their medications were necessary, they were also least concerned about their  
38 medicines, were not threatened by their illness, and were not emotionally affected by it (low  
39 emotional representation). Also, they experienced few symptoms due to their illness, and had the  
40 least concern about their illness. It is also possible that because these patients were taking the  
41 lowest number of medicines and had the lowest number of chronic illness, they were healthier  
42 compared to other patients, and therefore more likely to easily manage their medicines. Providers  
43  
44  
45  
46  
47  
48  
49  
50  
51  
52  
53  
54  
55  
56  
57  
58  
59  
60

1  
2  
3 may continue to address the needs for taking medicines and provide interventions that emphasize  
4 the need for taking medicines.  
5  
6

7  
8 This study has several strengths. Horne et al (2009) classified patients' adherence  
9 behaviors based on beliefs in medicines using the mid-point score of the Beliefs in Medicines  
10 questionnaire. However, this current study used the clustering technique to allow for algorithm-  
11 based grouping based on both beliefs in medicines and illness perceptions founded on the  
12 Extended Self-Regulatory Model. Prior research has highlighted the importance of content and  
13 theory-driven components to enable replication of successful adherence interventions.<sup>47</sup> While it  
14 is important to address diabetes nonadherence via clinical interventions, we cannot underestimate  
15 the impact of patient psychosocial factors such as their individual perceptions of medication and  
16 illness, self-efficacy, and health literacy in the management of diabetes. Brief, valid, and reliable  
17 questionnaires that can easily quantify these psychosocial factors are available and may be  
18 included in adherence support programs.<sup>40</sup>  
19  
20  
21  
22  
23  
24  
25  
26  
27  
28  
29  
30  
31  
32

33 The study limitations are the use of a convenience sample from two clinics in one state,  
34 hereby limiting the generalizability of the study. The use of a self-reported measure to evaluate  
35 medication adherence, rather than objective measures such as the use of pill counts might lead to  
36 overestimation. However, prior studies show the reliability and validity of self-report adherence  
37 measures. Data were collected either before or after patients' medical encounter depending on  
38 the flow of the clinic. The timing of the medical encounter may influence patient responses to  
39 questions about illness and treatment beliefs. This variable was not accounted for in the data  
40 analysis. The concurrent assessment of illness perceptions, beliefs in medicines, and adherence  
41 in a cross-sectional manner is a limitation. A longitudinal study that evaluates changes in beliefs  
42 overtime and examines how these changes relate to changes in behavior and outcomes will be  
43  
44  
45  
46  
47  
48  
49  
50  
51  
52  
53  
54  
55  
56  
57  
58  
59  
60

1  
2  
3 considered in the future. HbA1c was measured retrospectively. Though we used the most recent  
4 values from patients' medical record which is acceptable by clinical practitioners for standard  
5 diabetes care, this retrospective measurement of HbA1c could have limited our results. Though the  
6 B-IPQ total score categorizes respondents into two categories without taking into consideration  
7 the individual domains of the illness perceptions, this was needed for clustering their adherence.  
8  
9  
10  
11  
12  
13  
14  
15  
16  
17  
18  
19  
20  
21  
22  
23  
24  
25  
26  
27  
28  
29  
30  
31  
32  
33  
34  
35  
36  
37  
38  
39  
40  
41  
42  
43  
44  
45  
46  
47  
48  
49  
50  
51  
52  
53  
54  
55  
56  
57  
58  
59  
60

Once the clusters were formed, the illness perception domain characteristics of each cluster were analyzed and compared.

## Conclusions

This study used a cluster analysis to characterize patients' adherence behavior based on their beliefs in both medicines and illnesses and psychosocial factors. Using evidence-based theoretical approaches, four clusters were formed with characteristics that suggest different types of interventions for each cluster. Medication nonadherence is a complex behavior to understand and targeted interventions are often recommended. Data that can help discriminate between large groups of non-adherent individuals is needed in developing more personalized interventions. Though a large number of patients in two separate clusters (ambivalent and skeptical) were non-adherent to their medicines; patients within each non-adherent clusters still had distinct beliefs in medicines, illness perceptions, and other psychosocial characteristics that may help providers target tailored behavioral, psychological-based adherence interventions (for ambivalent clusters), as well as education and motivation-based adherence interventions (for skeptical clusters). Also, patients who are adherent may still need interventions that support and/or enhance their use of medicines (for indifferent clusters), and support individualized self-management strategies used for control of illness (for accepting clusters).

## References

1. Hu D, Juarez DT, Yeboah M, Castillo TP. Interventions to increase medication adherence in African-American and Latino populations: a literature review. *Hawaii J Med Public Health*. 2014;73(1):11-18.
2. Kelly JA, Kalichman SC. Behavioral research in HIV/AIDS primary and secondary prevention: recent advances and future directions. *J Consult Clin Psychol*. 2002;70(3):626-639.
3. Leventhal H, Nerenz DR, Purse J. *Illness representations and coping with health threats*. 1984.
4. AHRQ. Better adherence to diabetes medications means fewer hospitalizations and emergency department visits. 2011; <https://archive.ahrq.gov/news/newsletters/research-activities/mar11/0311RA8.html>. Accessed March 13, 2017.
5. Haynes RB, Taylor DW, Sackett DL. Compliance in health care. 1979.
6. Haynes RB, Ackloo E, Sahota N, McDonald HP, Yao X. Interventions for enhancing medication adherence. *Cochrane Database Syst Rev*. 2008(2):CD000011.
7. Balkrishnan R, Rajagopalan R, Camacho FT, Huston SA, Murray FT, Anderson RT. Predictors of medication adherence and associated health care costs in an older population with type 2 diabetes mellitus: a longitudinal cohort study. *Clin Ther*. 2003;25(11):2958-2971.
8. Gonzalez JS, Tanenbaum ML, Commissariat PV. Psychosocial factors in medication adherence and diabetes self-management: Implications for research and practice. *Am Psychol*. 2016;71(7):539-551.

- 1  
2  
3 9. Krass I, Schieback P, Dhippayom T. Adherence to diabetes medication: a systematic  
4 review. *Diabetic medicine : a journal of the British Diabetic Association*.  
5  
6 2015;32(6):725-737.  
7
- 8  
9  
10 10. Bailey SC, Brega AG, Crutchfield TM, et al. Update on health literacy and diabetes.  
11  
12 *Diabetes Educ*. 2014;40(5):581-604.  
13
- 14  
15 11. Horne R, Weinman J. Self-regulation and self-management in asthma: exploring the role  
16  
17 of illness perceptions and treatment beliefs in explaining non-adherence to preventer  
18  
19 medication. *Psychology and Health*. 2002;17(1):17-32.  
20
- 21  
22 12. Horne R. *Representations of medication and treatment: advances in theory and*  
23  
24 *measurement*. Harwood Academic London; 1997.  
25
- 26  
27 13. Horne R. Treatment perceptions and self-regulation. *The self-regulation of health and*  
28  
29 *illness behaviour*. 1 edition ed: Routledge; 2003:138-153.  
30
- 31  
32 14. Broadbent E, Donkin L, Stroh JC. Illness and treatment perceptions are associated with  
33  
34 adherence to medications, diet, and exercise in diabetic patients. *Diabetes Care*.  
35  
36 2011;34(2):338-340.  
37
- 38  
39 15. Gunther M, Foisy M, Houston S, Guirguis L, Hughes C. Treatment beliefs, illness  
40  
41 perceptions, and non-adherence to antiretroviral therapy in an ethnically diverse patient  
42  
43 population. *Int J Clin Pharm*. 2014;36(1):105-111.  
44
- 45  
46 16. Shiyabola OO, Nelson J. Illness perceptions, beliefs in medicine and medication non-  
47  
48 adherence among South Dakota minority women with diabetes: a pilot study. *South*  
49  
50 *Dakota medicine : the journal of the South Dakota State Medical Association*.  
51  
52 2011;64(10):365-368.  
53  
54  
55  
56  
57  
58  
59  
60

17. Unni EJ, Shiyanbola O, Farris KB. Medication adherence: a complex behavior of medication and illness beliefs. *Aging Health*. 2013;9(4):377-387.
18. Leventhal H, Brissette I, Leventhal EA. The common-sense model of self-regulation of health and illness. *The self-regulation of health and illness behaviour*. 2003;1:42-65.
19. Phillips LA, Leventhal EA, Leventhal H. Factors associated with the accuracy of physicians' predictions of patient adherence. *Patient Educ Couns*. 2011;85(3):461-467.
20. Phillips LA, Leventhal H, Leventhal EA. Physicians' communication of the common-sense self-regulation model results in greater reported adherence than physicians' use of interpersonal skills. *British journal of health psychology*. 2012;17(2):244-257.
21. Horne R, Parham R, Driscoll R, Robinson A. Patients' attitudes to medicines and adherence to maintenance treatment in inflammatory bowel disease. *Inflammatory bowel diseases*. 2009;15(6):837-844.
22. Smithson WH, Hukins D, Colwell B, Mathers N. Developing a method to identify medicines non-adherence in a community sample of adults with epilepsy. *Epilepsy & Behavior*. 2012;24(1):49-53.
23. Chapman SC, Horne R, Chater A, Hukins D, Smithson WH. Patients' perspectives on antiepileptic medication: relationships between beliefs about medicines and adherence among patients with epilepsy in UK primary care. *Epilepsy & behavior : E&B*. 2014;31:312-320.
24. Unni E, Shiyanbola OO. Clustering medication adherence behavior based on beliefs in medicines and illness perceptions in patients taking asthma maintenance medications. *Curr Med Res Opin*. 2016;32(1):113-121.

- 1  
2  
3 25. Morisky DE, DiMatteo MR. Improving the measurement of self-reported medication  
4 nonadherence: response to authors. *J Clin Epidemiol*. 2011;64(3):255-257; discussion  
5 258-263.  
6  
7
- 8  
9  
10 26. Morisky DE, Ang A, Krousel-Wood M, Ward HJ. Predictive validity of a medication  
11 adherence measure in an outpatient setting. *J Clin Hypertens (Greenwich)*.  
12 2008;10(5):348-354.  
13  
14
- 15  
16 27. Krousel-Wood M, Islam T, Webber LS, Re RN, Morisky DE, Muntner P. New  
17 medication adherence scale versus pharmacy fill rates in seniors with hypertension. *Am J*  
18 *Manag Care*. 2009;15(1):59-66.  
19  
20
- 21  
22 28. Al-Qazaz H, Hassali MA, Shafie AA, Sulaiman SA, Sundram S, Morisky DE. The eight-  
23 item Morisky Medication Adherence Scale MMAS: translation and validation of the  
24 Malaysian version. *Diabetes Res Clin Pract*. 2010;90(2):216-221.  
25  
26
- 27  
28 29. Sakthong P, Chabunthom R, Charoenvisuthiwongs R. Psychometric properties of the  
29 Thai version of the 8-item Morisky Medication Adherence Scale in patients with type 2  
30 diabetes. *Ann Pharmacother*. 2009;43(5):950-957.  
31  
32
- 33  
34 30. Horne R, Weinman J, Hankins M. The beliefs about medicines questionnaire: the  
35 development and evaluation of a new method for assessing the cognitive representation  
36 of medication. *Psychology and health*. 1999;14(1):1-24.  
37  
38
- 39  
40 31. Broadbent E, Petrie KJ, Main J, Weinman J. The brief illness perception questionnaire. *J*  
41 *Psychosom Res*. 2006;60(6):631-637.  
42  
43
- 44  
45 32. Weiss BD, Mays MZ, Martz W, et al. Quick assessment of literacy in primary care: the  
46 newest vital sign. *Ann Fam Med*. 2005;3(6):514-522.  
47  
48  
49  
50  
51  
52  
53  
54  
55  
56  
57  
58  
59  
60

- 1  
2  
3 33. Haun JN, Valerio MA, McCormack LA, Sorensen K, Paasche-Orlow MK. Health literacy  
4 measurement: an inventory and descriptive summary of 51 instruments. *J Health*  
5  
6  
7  
8 *Commun.* 2014;19 Suppl 2:302-333.  
9
- 10 34. Shigaki C, Kruse RL, Mehr D, et al. Motivation and diabetes self-management. *Chronic*  
11  
12 *Illn.* 2010;6(3):202-214.  
13
- 14 35. Kirk JK, Grzywacz JG, Arcury TA, et al. Performance of health literacy tests among  
15  
16  
17  
18  
19  
20 36. Risser J, Jacobson TA, Kripalani S. Development and psychometric evaluation of the  
21  
22  
23  
24  
25  
26  
27 37. Lavsa SM, Holzworth A, Ansani NT. Selection of a validated scale for measuring  
28  
29  
30  
31 38. Chapman SCE, Horne R, Eade R, Balestrini S, Rush J, Sisodiya SM. Applying a  
32  
33  
34  
35  
36  
37  
38 39. Tibaldi G, Clatworthy J, Torchio E, Argentero P, Munizza C, Horne R. The utility of the  
39  
40  
41  
42  
43  
44  
45 40. Chapman SCE, Horne R, Chater A, Hukins D, Smithson WH. Patients' perspectives on  
46  
47  
48  
49  
50  
51  
52  
53  
54  
55  
56  
57  
58  
59  
60



- 1  
2  
3 41. Rousseeuw PJ. Silhouettes: a graphical aid to the interpretation and validation of cluster  
4 analysis. *Journal of computational and applied mathematics*. 1987;20:53-65.  
5  
6  
7  
8 42. Mooi E, Sarstedt M. Cluster analysis. *A concise guide to market research*: Springer;  
9  
10 2010:237-284.  
11  
12 43. Samson A, Siam H. Adapting to major chronic illness: a proposal for a comprehensive  
13 task-model approach. *Patient Educ Couns*. 2008;70(3):426-429.  
14  
15  
16  
17 44. Snoek FJ, Pouwer F, Welch GW, Polonsky WH. Diabetes-related emotional distress in  
18 Dutch and U.S. diabetic patients: cross-cultural validity of the problem areas in diabetes  
19 scale. *Diabetes Care*. 2000;23(9):1305-1309.  
20  
21  
22  
23  
24 45. Rubin RR. Adherence to pharmacologic therapy in patients with type 2 diabetes mellitus.  
25 *Am J Med*. 2005;118 Suppl 5A:27S-34S.  
26  
27  
28  
29 46. Van der Ven N, Weinger K, Snoek F. Cognitive behaviour therapy: how to improve  
30 diabetes self-management. *Diabetes voice*. 2002;47(3):10-13.  
31  
32  
33 47. Clarkesmith DE, Pattison HM, Borg Xuereb C, Lane DA. Developing a Complex  
34 Educational–Behavioural Intervention: The TREAT Intervention for Patients with Atrial  
35 Fibrillation. Paper presented at: Healthcare2016.  
36  
37  
38  
39  
40 48. McCleary-Jones V. Health literacy and its association with diabetes knowledge, self-  
41 efficacy and disease self-management among African Americans with diabetes mellitus.  
42 *ABNF Journal*. 2011;22(2).  
43  
44  
45  
46  
47 49. Sleath B, Carpenter DM, Blalock SJ, et al. Development of a new diabetes medication  
48 self-efficacy scale and its association with both reported problems in using diabetes  
49 medications and self-reported adherence. *Patient Prefer Adherence*. 2016;10:1003-1010.  
50  
51  
52  
53  
54  
55  
56  
57  
58  
59

- 1  
2  
3 50. Benoit SR, Fleming R, Philis-Tsimikas A, Ji M. Predictors of glycemc control among  
4 patients with Type 2 diabetes: a longitudinal study. *BMC Public Health*. 2005;5(1):36.  
5  
6  
7  
8  
9  
10  
11  
12  
13  
14  
15  
16  
17  
18  
19  
20  
21  
22  
23  
24  
25  
26  
27  
28  
29  
30  
31  
32  
33  
34  
35  
36  
37  
38  
39  
40  
41  
42  
43  
44  
45  
46  
47  
48  
49  
50  
51  
52  
53  
54  
55  
56  
57  
58  
59  
60

Table 1 Mean score and percentage comparison of adherence, psychosocial factors, and demographics between clusters (n=174)

| Variables                                             | Total         | Cluster 1<br>(Ambivalent)     | Cluster 2<br>(Skeptical)      | Cluster 3<br>(Indifferent)    | Cluster 4<br>(Accepting)      |
|-------------------------------------------------------|---------------|-------------------------------|-------------------------------|-------------------------------|-------------------------------|
| Number of subjects                                    | 174           | 30 (17.2%)                    | 53 (30.5%)                    | 51 (29.3%)                    | 40 (23.0%)                    |
| Medication adherence <sup>a,***</sup>                 | 5.87 ± 1.87   | 4.87 ± 1.78 <sup>g,h</sup>    | 5.43 ± 1.89 <sup>j</sup>      | 6.39 ± 1.67 <sup>g</sup>      | 6.53 ± 1.72 <sup>h,j</sup>    |
| Necessity beliefs (Mean ± SD) <sup>***</sup>          | 18.88 ± 4.27  | 21.93 ± 2.77 <sup>f,g</sup>   | 18.23 ± 1.76 <sup>f,i,j</sup> | 14.59 ± 3.71 <sup>g,i</sup>   | 22.93 ± 2.18 <sup>j</sup>     |
| Concern beliefs (Mean ± SD) <sup>***</sup>            | 13.24 ± 4.35  | 18.83 ± 3.66 <sup>f,g,h</sup> | 14.85 ± 2.07 <sup>f,i,j</sup> | 11.12 ± 2.71 <sup>g,i</sup>   | 9.60 ± 3.41 <sup>h,j</sup>    |
| Illness perceptions (IP) (Mean ± SD) <sup>b,***</sup> | 37.13 ± 11.06 | 48.33 ± 8.39 <sup>f,g,h</sup> | 41.72 ± 6.23 <sup>f,i,j</sup> | 27.63 ± 9.87 <sup>g,i,k</sup> | 34.78 ± 8.07 <sup>h,j,k</sup> |
| Consequence IP <sup>b,***</sup>                       | 4.88 ± 2.91   | 7.30 ± 2.55 <sup>f,g,h</sup>  | 5.13 ± 2.43 <sup>f,i</sup>    | 2.94 ± 2.60 <sup>g,i,k</sup>  | 5.20 ± 2.55 <sup>h,k</sup>    |
| Timeline IP <sup>b</sup>                              | 8.20 ± 2.44   | 8.07 ± 2.49                   | 8.51 ± 1.85                   | 7.53 ± 2.98                   | 8.73 ± 2.18                   |
| Personal control IP <sup>b</sup>                      | 3.53 ± 2.51   | 3.73 ± 3.06                   | 4.13 ± 2.31                   | 3.20 ± 2.40                   | 3.00 ± 2.33                   |
| Treatment control IP <sup>b,***</sup>                 | 1.93 ± 2.03   | 2.57 ± 2.54 <sup>h</sup>      | 2.57 ± 1.82 <sup>j</sup>      | 1.75 ± 2.01                   | 0.83 ± 1.34 <sup>h,j</sup>    |
| Identity IP <sup>b,***</sup>                          | 4.51 ± 2.91   | 7.17 ± 2.30 <sup>f,g,h</sup>  | 5.17 ± 2.41 <sup>f,i,j</sup>  | 2.35 ± 2.50 <sup>g,i</sup>    | 4.40 ± 2.43 <sup>h,j</sup>    |
| Concern IP <sup>b,***</sup>                           | 6.85 ± 2.82   | 8.63 ± 2.09 <sup>g</sup>      | 7.38 ± 2.11 <sup>i</sup>      | 4.98 ± 3.22 <sup>g,i,k</sup>  | 7.20 ± 2.31 <sup>k</sup>      |
| Coherence IP <sup>b,*</sup>                           | 2.79 ± 2.52   | 3.53 ± 3.56                   | 3.15 ± 1.91 <sup>j</sup>      | 2.69 ± 2.65                   | 1.88 ± 1.84 <sup>j</sup>      |
| Emotional representation IP <sup>b,***</sup>          | 4.45 ± 3.32   | 7.33 ± 2.71 <sup>g,h</sup>    | 5.68 ± 2.56 <sup>i,j</sup>    | 2.20 ± 2.99 <sup>g,i</sup>    | 3.55 ± 2.72 <sup>h,j</sup>    |

|    |                                            |               |                              |                           |               |                              |
|----|--------------------------------------------|---------------|------------------------------|---------------------------|---------------|------------------------------|
| 1  |                                            |               |                              |                           |               |                              |
| 2  |                                            |               |                              |                           |               |                              |
| 3  | Self-efficacy (Mean ± SD) <sup>c, **</sup> | 33.24 ± 5.96  | 31.30 ± 6.65 <sup>h, j</sup> | 32.02 ± 6.18 <sup>l</sup> | 33.47 ± 6.11  | 36.00 ± 3.64 <sup>h, j</sup> |
| 4  |                                            |               |                              |                           |               |                              |
| 5  | Health literacy (Mean ± SD) <sup>d</sup>   | 3.72 ± 2.02   | 3.13 ± 1.94                  | 3.96 ± 1.91               | 3.80 ± 2.11   | 3.75 ± 2.08                  |
| 6  |                                            |               |                              |                           |               |                              |
| 7  | Inadequate                                 |               | 7 (23.3%)                    | 7 (13.2%)                 | 7 (17.5%)     | 10 (19.6%)                   |
| 8  |                                            |               |                              |                           |               |                              |
| 9  | Marginal                                   |               | 11 (36.7%)                   | 10 (18.9%)                | 9 (22.5%)     | 9 (17.6%)                    |
| 10 |                                            |               |                              |                           |               |                              |
| 11 | Adequate                                   |               | 12 (40.0%)                   | 36 (67.9%)                | 24 (60%)      | 32 (62.7%)                   |
| 12 |                                            |               |                              |                           |               |                              |
| 13 | Age                                        | 58.74 ± 12.84 | 55.17 ± 14.00                | 57.85 ± 11.48             | 59.04 ± 13.92 | 62.20 ± 11.73                |
| 14 |                                            |               |                              |                           |               |                              |
| 15 | White <sup>**</sup>                        | 118 (67.8%)   | 12 (40.0%)                   | 38 (71.7%)                | 29 (72.5%)    | 39 (76.5%)                   |
| 16 |                                            |               |                              |                           |               |                              |
| 17 | Female                                     | 100 (57.5%)   | 18 (60.0%)                   | 30 (56.6%)                | 20 (50.0%)    | 32 (62.7%)                   |
| 18 |                                            |               |                              |                           |               |                              |
| 19 | Education higher than high school          | 108 (62.1%)   | 15 (50.0%)                   | 32 (60.4%)                | 35 (68.6%)    | 26 (65.0%)                   |
| 20 |                                            |               |                              |                           |               |                              |
| 21 | Education                                  |               |                              |                           |               |                              |
| 22 |                                            |               |                              |                           |               |                              |
| 23 | Completed 8 <sup>th</sup> grade or less    | 4 (2.3%)      | 1 (3.3%)                     | 0 (0.0%)                  | 1 (2.0%)      | 2 (5.0%)                     |
| 24 |                                            |               |                              |                           |               |                              |
| 25 | Some high school                           | 15 (8.6%)     | 5 (16.7%)                    | 3 (5.7%)                  | 5 (9.8%)      | 2 (5.0%)                     |
| 26 |                                            |               |                              |                           |               |                              |
| 27 | High school graduate or GED                | 47 (27.0%)    | 9 (30.0%)                    | 18 (34.0%)                | 10 (19.6%)    | 10 (25.0%)                   |
| 28 |                                            |               |                              |                           |               |                              |
| 29 | Some college or technical school           | 67 (38.5%)    | 10 (33.3%)                   | 14 (26.4%)                | 26 (51.0%)    | 17 (42.5%)                   |
| 30 |                                            |               |                              |                           |               |                              |
| 31 | College graduate                           | 24 (13.8%)    | 3 (10.0%)                    | 12 (22.6%)                | 6 (11.8%)     | 3 (7.5%)                     |
| 32 |                                            |               |                              |                           |               |                              |
| 33 | Graduate degree                            | 17 (9.8%)     | 2 (6.7%)                     | 6 (11.3%)                 | 3 (5.9%)      | 6 (15.0%)                    |
| 34 |                                            |               |                              |                           |               |                              |
| 35 |                                            |               |                              |                           |               |                              |
| 36 |                                            |               |                              |                           |               |                              |
| 37 |                                            |               |                              |                           |               |                              |
| 38 |                                            |               |                              |                           |               |                              |
| 39 |                                            |               |                              |                           |               |                              |
| 40 |                                            |               |                              |                           |               |                              |
| 41 |                                            |               |                              |                           |               |                              |
| 42 |                                            |               |                              |                           |               |                              |
| 43 |                                            |               |                              |                           |               |                              |
| 44 |                                            |               |                              |                           |               |                              |
| 45 |                                            |               |                              |                           |               |                              |
| 46 |                                            |               |                              |                           |               |                              |
| 47 |                                            |               |                              |                           |               |                              |

|                                                         |             |                             |                          |                                |                           |
|---------------------------------------------------------|-------------|-----------------------------|--------------------------|--------------------------------|---------------------------|
| Number of medications (Mean ± SD) <sup>***</sup>        | 7.77 ± 3.89 | 9.07 ± 4.21 <sup>g</sup>    | 8.19 ± 4.03 <sup>l</sup> | 5.80 ± 2.86 <sup>g, l, k</sup> | 8.75 ± 3.75 <sup>k</sup>  |
| Number of illness (Mean ± SD) <sup>**</sup>             | 3.86 ± 1.82 | 4.50 ± 2.03 <sup>g</sup>    | 3.89 ± 1.96              | 3.22 ± 1.47 <sup>g, k</sup>    | 4.28 ± 1.66 <sup>k</sup>  |
| Duration of diabetes diagnosed (Mean ± SD) <sup>*</sup> | 9.58 ± 7.08 | 8.75 ± 5.79                 | 9.25 ± 6.30              | 8.03 ± 7.14 <sup>k</sup>       | 12.61 ± 8.13 <sup>k</sup> |
| HbA1c level <sup>*</sup>                                | 7.66 ± 1.64 | 8.31 ± 2.14 <sup>g</sup>    | 7.86 ± 1.58              | 7.17 ± 1.32 <sup>g</sup>       | 7.52 ± 1.51               |
| Health status <sup>e, **</sup>                          | 2.64 ± 0.80 | 2.13 ± 0.90 <sup>f, g</sup> | 2.72 ± 0.77 <sup>f</sup> | 2.86 ± 0.75 <sup>g</sup>       | 2.65 ± 0.70               |

<sup>a</sup> Self-reported medication adherence was measured with the 8-item Morisky Medication Adherence Scale.

<sup>b</sup> Higher scores indicate higher specific illness perceptions. Personal control, treatment control, and coherence are reverse scored.

<sup>c</sup> The score of the self-efficacy on medication use ranges from 13 to 39. 13 items on a 3 point scale. Higher scores indicate higher levels of self-efficacy.

<sup>d</sup> Health literacy was measured with the Newest Vital Sign (NVS).

<sup>e</sup> One item on a 5 point scale. Higher scores indicate better self-reported health status.

<sup>f-k</sup> Significant differences based on the post-hoc analysis.

\*  $p < 0.05$ , \*\*  $p < 0.01$ , \*\*\*  $p < 0.001$

Table 2 Beliefs, psychosocial and clinical characteristics of the clusters

|                            | Clusters with non-adherence behavior |                          | Clusters with adherence behavior |                          |
|----------------------------|--------------------------------------|--------------------------|----------------------------------|--------------------------|
|                            | Cluster 1<br>(Ambivalent)            | Cluster 2<br>(Skeptical) | Cluster 3<br>(Indifferent)       | Cluster 4<br>(Accepting) |
| Medication Adherence       | Low adherence                        | Low adherence            | High adherence                   | High adherence           |
| Beliefs in medicines       | High NB                              | Low NB                   | Low NB                           | High NB                  |
|                            | High CB                              | High CB                  | Low CB                           | Low CB                   |
| Illness perceptions        | High IP                              | High IP                  | Low IP                           | Low IP                   |
| Self-efficacy              | Low SE                               | Low SE                   | High SE                          | High SE                  |
| Health literacy            | Low HL                               | High HL                  | High HL                          | High HL                  |
| Glycemic control           | High HbA1c                           | High HbA1c               | Low HbA1c                        | Low HbA1c                |
| Illness perception domains | High Consequence                     | High Consequence         | Low consequence                  | High consequence         |
|                            | High treatment control               | High treatment control   | Low treatment control            | Low treatment control    |
|                            | High identity                        | High identity            | Low identity                     | Low identity             |
|                            | High concern                         | High concern             | Low concern                      | High concern             |
|                            | High coherence                       | High coherence           | Low coherence                    | Low coherence            |

---

|                                  |                                  |                                 |                                 |
|----------------------------------|----------------------------------|---------------------------------|---------------------------------|
| High emotional<br>representation | High emotional<br>representation | Low emotional<br>representation | Low emotional<br>representation |
|----------------------------------|----------------------------------|---------------------------------|---------------------------------|

---

The high and low values for each variable is compared based on the mean values from all participants.

CB: concern beliefs; HbA1c: hemoglobin A1c levels; HL: health literacy; IP: illness perceptions; NB: necessity beliefs; SE: self-efficacy.

## MMAS-8 Retroactive & Corrective License

This Agreement entered into on January , 2018 between the the University of Wisconsin-Madison School of Pharmacy, 777 Highland Ave., Madison, WI 53705 ("Licensee"); MMAS Research, LLC (MMAS) 14725 NE 20th St. Bellevue Washington 98007 USA ("Licensor") shall constitute a retroactive and corrective license to use the MORISKY Medication Adherence Scale (MMAS-8) from March 2016- August 2016 to assess patients in the association of health literacy and self-efficacy on medication adherence and diabetes control study.

### SECTION 1. TERMS OF USAGE

**Ownership and Fees:** All psychometric products as well as their certified translations, adaptations, computer programs, software and scoring and coding algorithms, trade secrets, and any other related documents and information (including those in electronic form) which embody or are related to the Morisky Widget or MMAS tools (including without limitation the Morisky Medication Adherence Scale 4- and 8-item versions, Morisky Medication Adherence Protocol and any documentation thereof are the intellectual property of Licensor.

**Translations:** Permission will only be granted to use MMAS certified translations from the Morisky Widget or with special arrangements approved and signed by the Licensor. There are no exceptions.

Changes or any modifications to the wording, phrasing or scoring of the MMAS-8 require written permission. If any changes made to the wording, phrasing or scoring of any MMAS item or other Morisky document without permission, it will be considered a breach of the Morisky Widget license and the Licensor will have the right to suspend or terminate this Agreement.

Coding and scoring criteria of the MMAS are trade secrets of Licensor and as such can NEVER be divulged in any publication, presentation, or website without prior written permission from Licensor. If Licensee divulges MMAS scoring and coding criteria it will be considered a breach of the MMAS-8 license and the Licensor will have the right to suspend or terminate this Agreement.

**Copyright:** Permission to use the trademarks Morisky Widget, Morisky Medication Adherence Scale, "MMAS" is not and will not be granted for any unauthorized use or translations of the MMAS or other Licensor or Morisky intellectual property, in whole or in part. No electronic questionnaires, analyses, research results or publications based on unauthorized use of the MMAS will be permitted. The MMAS SCALE legend and required citations provided in Appendix 1 must be included in all manuscripts, web postings or other publication containing MMAS descriptions or results

In case of scientific, administrative or intellectual property misconduct in using the MORISKY system of questionnaires or the Morisky name or MMAS names, Licensor reserves the right to withdraw permission for use and to pursue all legal remedies. The Courts of the State of California and the U.S. District Court shall have personal and subject matter jurisdiction over any lawsuit relating to this Agreement. Venue shall be Los Angeles. This Agreement will be governed by the laws of California, as well as federal intellectual property laws. In the event of any litigation, the prevailing party, in addition to any other relief, shall be entitled to recover its reasonable attorney fees incurred.

The Morisky Widget, MMAS scales, scoring, coding agreed to in this license are non-transferrable and cannot be used by anyone other than the Licensee.

All licensees must submit to MMAS Research LLC all presentations and manuscripts that are being



1  
2 considered for abstracts/poster presentations or publication to make certain that all copyright and  
3 trademark requirements are included in all manuscripts submitted for publication. This is to protect  
4 the Licensee as MMAS Research LLC has encountered many violations of federal and international  
5 copyright laws from clients as well as individuals who use MMAS intellectual property without  
6 following the required copyright and trademark guidelines.  
7  
8

## 9 **SECTION 2. FEES**

10  
11 In consideration of Licensor granting Licensee a retroactive and corrective MMAS license. Licensee  
12 agrees to pay Licensor a onetime licensee fee of \$3500.00 (USD) within ten (10) days of execution of this  
13 Agreement by the parties. A 10% late fee will be assessed to all fees thirty (30) days or more past due.  
14 The fee includes corrective measures required by Licensor to cure Licensee's unauthorized use and  
15 modification of the MMAS-8.  
16  
17

## 18 **SECTION 3. DUTIES OF THE LICENSEE**

19  
20 Licensee agrees to adhere to all the terms and requirements of the MMAS-8 retroactive and  
21 corrective license, and the copyright guidelines in Appendix 1.  
22  
23

24 Licensee agrees to perform all of the corrective measures required by the Licensor to obtain a  
25 MMAS-8 retroactive and corrective license.  
26  
27

28  
29 Licensee agrees to correct the use of an incorrect MMAS-8 scoring and coding criteria that was  
30 used for 174 MMAS tests in the association of health literacy and self-efficacy on medication  
31 adherence and diabetes control study.  
32

33 Licensee will submit to the Licensor in a CSV file template, the patient's response to the MMAS-8  
34 questionnaire to correct the scoring and coding of 174 MMAS-8 patient tests.  
35  
36

37 Licensee agrees to certify the destruction of all MMAS-8 scales in its possession, both MMAS-8  
38 paper questionnaires and MMAS-8 electronic questionnaires.  
39  
40

## 41 **SECTION 4 DUTIES OF LICENSOR**

42  
43 Licensor will provide Licenss guidance and support for Licensee to implement the corrective measures  
44 necessary to cure its misuse of the MMAS-8.  
45  
46

47 If Licensee adheres to the terms and condition of this Morisky Widget license,  
48

49 Licensor waives all prior claims arising out of Licensee's misuse of the MMAS-8, all such misuse been  
50 now cured and the claims resolved and settled and that Licensor as the copyright and trademark holder,  
51 will agree not to sue or take any action against Licensee because of their past improper use of the  
52 MMAS-8  
53  
54  
55  
56  
57  
58  
59

1  
2  
3  
4  
5  
6  
7  
8  
9  
10  
11  
12  
13  
14  
15  
16  
17  
18  
19  
20  
21  
22  
23  
24  
25  
26  
27  
28  
29  
30  
31  
32  
33  
34  
35  
36  
37  
38  
39  
40  
41  
42  
43  
44  
45  
46  
47  
48  
49  
50  
51  
52  
53  
54  
55  
56  
57  
58  
59  
60

Please sign and return this license via email to Trubow1@gmail.com.

*Donald E. Morisky*

MMAS Research, LLC

Donald E. Moriaky, Sc.ID, MSPH      March 3, 2018

Donald Morisky, for Licensor      Date:

---

University of Wisconsin-Madison

*H. MURRAY*

*2/20/18*

Hartley Murray, C.P.M.  
Assistant Director, Purchasing Services  
UW Madison 21 N Park St. Suite 6101 Madison, WI. 53715

---

## Appendix 1

Required citations, acknowledgement and footnotes for the MMAS-8 are as follows.

Morisky DE, Ang A, Krousel-Wood M, Ward H. Predictive Validity of a Medication Adherence Measure for Hypertension Control. *Journal of Clinical Hypertension* 2008; 10(5):348-354

Krousel-Wood MA, Islam T, Webber LS, Re RS, Morisky DE, Muntner P. New Medication Adherence Scale Versus Pharmacy Fill Rates in Seniors with Hypertension. *Am J Manag Care* 2009;15(1):59-66.

Morisky DE, DiMatteo MR. Improving the measurement of self-reported medication nonadherence: Final response. *J Clin Epidemiol* 2011; 64:258-263. PMID:21144706

This acknowledgement and footnote are required in all articles and on all tables or figures which present the ©MMAS-8.

Use of the ©MMAS is protected by US Copyright laws. Permission for use is required. A license agreement is available from Donald E. Morisky, MMAS Research LLC 14725 NE 20<sup>th</sup> St. Bellevue WA 98007 or from [dmorisky@gmail.com](mailto:dmorisky@gmail.com)

# BMJ Open

## Utilizing the Extended Self-Regulatory Model to Characterize Diabetes Medication Adherence: A Cross-Sectional Study

|                                 |                                                                                                                                                                                                                                                                                                                                             |
|---------------------------------|---------------------------------------------------------------------------------------------------------------------------------------------------------------------------------------------------------------------------------------------------------------------------------------------------------------------------------------------|
| Journal:                        | <i>BMJ Open</i>                                                                                                                                                                                                                                                                                                                             |
| Manuscript ID                   | bmjopen-2018-022803.R1                                                                                                                                                                                                                                                                                                                      |
| Article Type:                   | Research                                                                                                                                                                                                                                                                                                                                    |
| Date Submitted by the Author:   | 09-Aug-2018                                                                                                                                                                                                                                                                                                                                 |
| Complete List of Authors:       | Shiyanbola, Olayinka; University of Wisconsin Madison School of Pharmacy, Social and Administrative Sciences<br>Unni, Elizabeth; Roseman University of Health Sciences,<br>Huang, Yen-ming; University of Wisconsin Madison School of Pharmacy, Social and Administrative Sciences<br>Lanier, Cameron; ETSU Bill Gatton College of Pharmacy |
| <b>Primary Subject Heading</b>: | Patient-centred medicine                                                                                                                                                                                                                                                                                                                    |
| Secondary Subject Heading:      | Health services research, Public health, Communication                                                                                                                                                                                                                                                                                      |
| Keywords:                       | Medication adherence, Beliefs in Medicines, Illness Perceptions, Diabetes medicines, Clustering                                                                                                                                                                                                                                             |
|                                 |                                                                                                                                                                                                                                                                                                                                             |

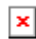

1  
2  
3 **Utilizing the Extended Self-Regulatory Model to Characterize Diabetes Medication**  
4 **Adherence: A Cross-Sectional Study**  
5  
6  
7

8 Olayinka O. Shiyanbola,<sup>1</sup> Elizabeth Unni,<sup>2</sup> Yen-Ming Huang,<sup>1</sup> Cameron Lanier<sup>1</sup>  
9

10  
11  
12 <sup>1</sup> Division of Social and Administrative Sciences, School of Pharmacy, University of Wisconsin-  
13 Madison, Wisconsin, USA  
14

15  
16  
17  
18 <sup>2</sup> Department of Pharmaceutical Sciences, College of Pharmacy, Roseman University of Health  
19 Sciences, Utah, USA  
20  
21

22  
23  
24 Corresponding Author: Olayinka O. Shiyanbola; Division of Social and Administrative Sciences,  
25 School of Pharmacy, University of Wisconsin-Madison, 777 Highland Avenue Madison, WI  
26 53705, USA (e-mail: Olayinka.Shiyanbola@wisc.edu)  
27  
28

29  
30  
31  
32 References: 55  
33

34  
35  
36 Table: 2  
37

38  
39 Words count: 4067  
40

41  
42  
43 Abstract: 301  
44  
45

46 Keywords: Medication Adherence, Beliefs in Medicines, Illness Perceptions, Type 2 diabetes,  
47 Clustering  
48  
49

1  
2  
3 **Objectives:** To cluster the adherence behaviors of patients with type 2 diabetes based on their  
4 beliefs in medicines and illness perceptions and examine the psychosocial, clinical, and  
5 sociodemographic characteristics of patient clusters.  
6  
7

8  
9  
10 **Design:** Cross-sectional study  
11

12 **Setting:** A face-to-face survey was administered to patients at two family medicine clinics in the  
13 Midwest, USA.  
14

15 **Participants:** One hundred and seventy four English-speaking  $\geq 20$  years old adult patients with  
16 type 2 diabetes who were prescribed at least one oral diabetes medicine daily were recruited  
17 using convenience sampling.  
18  
19

20 **Primary and secondary outcome measures:** Beliefs in medicines and illness perceptions were  
21 assessed using the Beliefs about Medicines Questionnaire and the Brief Illness Perception  
22 Questionnaire respectively. Self-reported medication adherence was assessed using the Morisky  
23 Medication Adherence Scale. Psychosocial correlates of adherence, health literacy and self-  
24 efficacy, were measured using the Newest Vital Sign and the Self-efficacy for Appropriate  
25 Medication Use respectively. Two-step cluster analysis was used to classify patients.  
26  
27

28 **Results:** Participants' mean age was 58.74 (SD = 12.84). The majority were female (57.5%).  
29 Four clusters were formed (non-adherent clusters: ambivalent and skeptical; adherent clusters;  
30 indifferent and accepting). The ambivalent cluster (n = 30, 17.2%) included low adherent  
31 patients with high necessity beliefs, high concern beliefs, and high illness perceptions. The  
32 skeptical cluster (n = 53, 30.5%) included low adherent patients with low necessity beliefs, but  
33 high concern beliefs and high illness perceptions. Both the accepting (n = 40, 23.0%) and  
34 indifferent (n = 51, 29.3%) clusters were comprised of patients with high adherence. Significant  
35 differences between the ambivalent, skeptical, accepting, and indifferent adherent clusters were  
36  
37  
38  
39  
40  
41  
42  
43  
44  
45  
46  
47  
48  
49  
50  
51  
52  
53  
54  
55  
56  
57  
58  
59  
60

1  
2  
3 based on self-efficacy, illness perception domains (treatment control, coherence), and  
4  
5 hemoglobin A1c ( $p < 0.01$ ).  
6

7 **Conclusions:** Patients with diabetes in specific non-adherent and adherent clusters still have  
8  
9 distinct beliefs as well as psychosocial characteristics that may help providers target tailored  
10  
11 medication adherence interventions.  
12  
13

### 14 15 16 **Strengths and limitations of this study**

- 17 • This is the first study to use a clustering technique to allow for algorithm-based grouping  
18  
19 based on both beliefs in medicines and illness perceptions founded on the Extended Self-  
20  
21 Regulatory Model among patients with diabetes.  
22  
23
- 24 • This study highlighted the importance of content and theory-driven components to enable  
25  
26 a possible mechanism for the development of tailored adherence interventions.  
27  
28
- 29 • This study focused on the impact of patient psychosocial factors such as their individual  
30  
31 perceptions of medication and illness, self-efficacy, and health literacy in the  
32  
33 management of diabetes.  
34  
35
- 36 • A convenience sample from two clinics in one state, hereby limiting the generalizability  
37  
38 of the study.  
39  
40
- 41 • The use of a self-reported measure to evaluate medication adherence, rather than  
42  
43 objective measures.  
44  
45  
46  
47  
48

49 **Funding statement:** This research received no specific grant from any funding agency in the  
50  
51 public, commercial or not-for-profit sectors.  
52

53 **Competing Interests:** The authors have no competing interests.  
54  
55  
56  
57  
58  
59

1  
2  
3 **Author Contributors:** OOS and EU designed the study. OOS, YH, and CL were involved in  
4 data collection and data analysis. OOS wrote the manuscript, and EU and YH critically revised  
5 the content. All authors approved the final version of the manuscript.  
6  
7

8  
9  
10 **Patient Consent:** Obtained

11  
12 **Acknowledgment:** The authors would like to thank Dr. Paul Smith for helping with part of the  
13 study's data collection process. Use of the ©MMAS is protected by US Copyright laws.  
14

15  
16 Permission for use is required. A license agreement is available from: Donald E. Morisky,  
17

18  
19 MMAS Research LLC 14725 NE 20th St. Bellevue WA 98007 or from dmorisky@gmail.com.  
20

21  
22 We have obtained written permission from copyright owners for any excerpts from copyrighted  
23 works that are included and have credited the sources in the article or the supplemental materials.  
24

25  
26 Portions of this work were presented at the 2017 American Pharmacist Association Meeting and  
27

28  
29 published in an abstract by the Journal of the American Pharmacists Association (Volume 57,  
30

31  
32 Issue 3, May–June 2017, Pages e1-e142)

33  
34 **Ethical approval:** The Health Sciences Institutional Review Board of the University of  
35  
36 Wisconsin-Madison.

37  
38 **Data sharing statement:** No additional data are available.  
39  
40  
41  
42  
43  
44  
45  
46  
47  
48  
49  
50  
51  
52  
53  
54  
55  
56  
57  
58  
59  
60



## Introduction

Medication adherence, defined as the extent to which taking medications corresponds with recommendations by a healthcare provider is essential for treatment success.<sup>1</sup> Poor adherence results in increased risk of mortality, increased emergency room visits, and reduced quality of life.<sup>2-5</sup> In general, rates of medication adherence are below 50%.<sup>6</sup> However, for patients with type 2 diabetes, these rates are as low as 36%.<sup>7</sup> It is estimated that a 10% improvement in diabetes medication adherence would lead to at least a 6.6% reduction in hospitalizations.<sup>7</sup>

Among patients with diabetes, medication adherence has been found to be influenced by psychosocial factors, such as beliefs about illness and treatment, self-efficacy and perceived control, self-regulation, and emotional states.<sup>8</sup> Of the various factors that influence medication adherence, Horne and Weinman (2002) showed that sociodemographic and clinical factors explain only a small amount of variance in medication adherence, whereas illness perceptions and patient beliefs in medicines are substantial independent predictors.<sup>9</sup> Since patient clinical and sociodemographics are difficult to change, it makes sense to focus on patient factors that are modifiable, practical for interventions, and can be addressed by health providers.

Studies based on the Extended Self-Regulatory Model show that when patients are diagnosed with an illness, they develop a pattern of beliefs about their condition and treatment, which then influences their medication adherence.<sup>10-15</sup> The Self-Regulatory Model (also called the Common Sense Model) was developed to explain illness-related coping behaviors including adherence to treatment, based on patient perceptions of their illness.<sup>16</sup> Horne et al. extended the Self-Regulatory Model by integrating beliefs about treatment when research identified beliefs about treatment as proximal determinants of coping strategies such as medication adherence compared with illness perceptions.<sup>9,10</sup> In prior research, Phillips and colleagues suggested that

1  
2  
3 patient adherence was greater when illness and treatment perceptions were addressed or  
4  
5 discussed during patients' medical encounter, and that healthcare providers were better able to  
6  
7 judge patient agreement regarding the illness and treatment when patients reported these  
8  
9 discussions occurred.<sup>17,18</sup>

12 To design feasible and useful medication adherence interventions, Horne et al. originally  
13  
14 classified patients with chronic illnesses into four attitudinal groups (accepting, ambivalent,  
15  
16 skeptical, and indifferent) based on their beliefs about their treatment.<sup>19</sup> While “accepting”  
17  
18 patients, with high necessity beliefs and low concerns, had the highest medication adherence,  
19  
20 “skeptical” patients, with low perceived need of medications and high concerns, had the lowest  
21  
22 adherence levels. The other patient groups, including the “ambivalent” (high necessity beliefs  
23  
24 and high concerns), and the “indifferent” (low necessity beliefs and low concerns) were also  
25  
26 likely to be non-adherent.<sup>19</sup> Though medication non-adherence is a common problem among  
27  
28 patients with chronic illnesses, they hardly discuss this behavior with their health providers  
29  
30 during routine visits.<sup>20</sup> Various available tools used to identify medication adherence are not  
31  
32 usable in clinical consultations because of the short time available to providers.<sup>21</sup> Hence,  
33  
34 clustering patients' adherence behavior based on their beliefs may provide a mechanism for  
35  
36 providers to focus on the specific belief needs of the patients in the context of their psychosocial  
37  
38 characteristics. A previous study based on the Extended Self-Regulatory Model used both illness  
39  
40 perceptions and beliefs in medicines to cluster patients with asthma and was able to develop the  
41  
42 same clusters as developed by Horne et al.<sup>22</sup> Additionally, each cluster had psychosocial  
43  
44 characteristics that were unique to them. However, further studies were needed to determine  
45  
46 whether the four attitudinal group structure that includes illness perceptions also holds with other  
47  
48 chronic disease conditions.  
49  
50  
51  
52  
53  
54  
55  
56  
57  
58  
59  
60

1  
2  
3 Clustering will provide a mechanism for providers to have a more tailored approach to  
4 addressing adherence than the general ‘one size fits all’ approach. For example, the counseling  
5 needed for a skeptical patient can be very different from an ambivalent patient. Though both  
6 these sets of patients have issues with their beliefs in medicines, they are quite different in their  
7 beliefs and psychosocial characteristics. Clustering can be done during the visit with the provider.  
8  
9 A short validated questionnaire or online profiling tool that patients complete in advance of a  
10 consultation could be developed, which automatically calculates which cluster a patient belongs  
11 to. The patient’s cluster with its unique characteristics can be included in a patient’s record, and  
12 available to providers during the patient visit, similar to reviewing a patient’s medical history.  
13  
14 This will allow for an effective tailored counseling approach during the short visit time.

15  
16  
17  
18  
19  
20  
21  
22  
23  
24  
25  
26 Diabetes is a chronic disease condition with reportedly high non-adherence rates.<sup>23,24</sup>  
27  
28 Thus, developing a mechanism that will assist physicians in providing tailored communications  
29 to patients who are non-adherent with their diabetes medications can be effective and beneficial.  
30  
31

32  
33 The objectives of this study were to:

- 34  
35 1) Cluster the adherence behaviors of patients with type 2 diabetes based on their beliefs in  
36 medicines and illness perceptions.  
37  
38 2) Examine the psychosocial, clinical and sociodemographic characteristics of patient clusters.  
39  
40  
41

42 This study hypothesized that patient clusters with high concern beliefs and low necessity  
43 beliefs will also have high threatening illness perceptions, and groups with low concern beliefs  
44 and high necessity beliefs will have low threatening illness perceptions. It is also hypothesized  
45 that identified patient clusters will have unique psychosocial, clinical, and sociodemographic  
46 characteristics.  
47  
48  
49  
50  
51  
52

## 53 54 **Methods**

55  
56  
57  
58  
59  
60

1  
2  
3 Using a cross-sectional study design, a face-to-face survey was administered to English-speaking,  
4  $\geq 20$  years old patients, with type 2 diabetes who were prescribed at least one oral diabetes  
5  
6 medicine daily. Patients were recruited using convenience sampling. Information on eligible  
7  
8 patients was retrieved from the electronic health record database of two family medicine clinics  
9  
10 in a Midwestern state in the United States.  
11  
12  
13

#### 14 *Data collection*

15  
16 Front desk receptionist at two clinics provided study information sheets to eligible patients who  
17  
18 were waiting for their appointment. After patients reviewed the information, they met with a  
19  
20 research assistant to indicate their interests in participating. The research assistant verified the  
21  
22 patient's eligibility from the clinic's patient log, administered the informed consent form, and  
23  
24 completed the 10-to-20-minute survey with the consented participant in a private area at the  
25  
26 clinic. Participants were allowed to complete the survey before or after their scheduled clinic  
27  
28 appointments, depending on clinic flow and their preferences. Informed consent was obtained  
29  
30 from all individual participants included in the study. All data collection occurred from March  
31  
32 2016 to August 2016. Participants were compensated with US\$25 cash, upon completion of the  
33  
34 survey. The University Health Sciences Institutional Review Board approved the study.  
35  
36  
37  
38  
39

#### 40 *Measures*

41  
42 Self-reported medication adherence was assessed using the 8-item Morisky Medication  
43  
44 Adherence Scale (MMAS-8), a widely used scale in patients with diabetes.<sup>25-29</sup> The total score of  
45  
46 the MMAS-8 ranged from 0 to 8, and MMAS-8 scores of  $< 6$ ,  $6$  to  $< 8$ , and  $8$  reflected low,  
47  
48 medium, and high medication adherence, respectively.<sup>25</sup> The 10-item Beliefs in Medicines  
49  
50 Questionnaire (BMQ) was used to measure patient beliefs in medications.<sup>30</sup> The BMQ includes  
51  
52 the necessity beliefs and concern beliefs sub-scales measured on five-point Likert-type scales  
53  
54  
55  
56  
57  
58  
59  
60

1  
2  
3 with 'strongly disagree' to 'strongly agree' response options. The range of scores for each sub-  
4 scale was 5-25, with a higher score meaning stronger concern beliefs or stronger necessity  
5 beliefs about the medicine.<sup>30</sup> The 8-item Brief-Illness Perception Questionnaire (B-IPQ) was  
6  
7 used to measure patients' perceptions about diabetes.<sup>31</sup> This validated instrument includes survey  
8 items assessing patient illness perceptions about diabetes along the cognitive domains of the self-  
9 regulatory model as well as their emotional responses to having diabetes. Each survey item of the  
10 B-IPQ was assessed on a scale of 0-10 with higher scores indicating stronger threatening  
11 perceptions along the illness perception dimensions.<sup>31</sup>  
12  
13  
14  
15  
16  
17  
18  
19  
20

21 Finally, we assessed other patient psychosocial correlates of medication adherence, i.e.  
22 health literacy and self-efficacy. Health literacy assessed using the 6-item Newest Vital Sign  
23 (NVS) has been extensively used across studies including patients with type 2 diabetes and can  
24 be completed in a short time (3-5 minutes).<sup>32-35</sup> Each question was scored as "0" for an incorrect  
25 response and "1" for a correct response for a total score of 0 to 6. Patients with scores less than 2  
26 represented a high likelihood of inadequate health literacy, 2 to 3 indicated the possibility of  
27 marginal health literacy, and more than 3 suggested adequate health literacy.<sup>32,36</sup>  
28  
29  
30  
31  
32  
33  
34  
35  
36

37 Self-efficacy measured using the 13-item Self-efficacy for Appropriate Medication Use  
38 Scale (SEAMS) was used in examining medication self-efficacy in chronic disease management,  
39 and is appropriate regardless of patient literacy skills.<sup>37,38</sup> Patients indicated under a range of  
40 situations, their level of confidence regarding taking medications correctly using a 3-point Likert  
41 scale (1 = not confident, 2 = somewhat confident, and 3 = very confident). The total score of the  
42 SEAMS ranged from 13 to 39 with higher scores indicating more confidence in adhering to  
43 medication use.<sup>37</sup>  
44  
45  
46  
47  
48  
49  
50  
51  
52  
53  
54  
55  
56  
57  
58  
59  
60

1  
2  
3 Other variables included sociodemographic factors, such as age, gender, highest  
4 education level, race, health insurance, and the annual household income level; patient clinical  
5 factors, such as the number of chronic illnesses, self-reported health status, number of  
6 medications used, frequency of daily diabetes medication use, duration of diagnosis of type 2  
7 diabetes, and whether the patient used insulin or not. Besides the main predictor variables,  
8 patients' hemoglobin A1c (HbA1c) values in the prior six months were retrieved from electronic  
9 medical records, with lower HbA1c values  $\leq 7.0\%$  representing better glycemic control.<sup>39</sup> The  
10 average duration between the day of the latest HbA1c testing and the day of the patient  
11 completing the survey was  $43.3 \pm 84.6$  days (median: 7 days).  
12  
13  
14  
15  
16  
17  
18  
19  
20  
21  
22

### 23 *Data analysis*

24  
25  
26 A two-step cluster analysis was used to classify patients' medication adherence behavior based  
27 on their beliefs in medicines and illness perceptions.<sup>40</sup> The number of clusters to be formed was  
28 kept a priori at four, a number determined by the researchers based on Horne's earlier studies  
29 and our prior work.<sup>19,21,22,41,42</sup> The cluster analysis technique organizes observed data (e.g.  
30 patients) into meaningful groups or clusters based on combinations of the independent variables  
31 (e.g. beliefs in medicines and illness perceptions). This process maximizes the similarity of cases  
32 within each cluster, but also maximizes the dissimilarity between the groups based on the log-  
33 likelihood distance between the data points.<sup>40</sup> Using this method allows the clusters to be created  
34 without a preconceived notion of what the clusters may look like. Though there are no rules-of-  
35 thumb about the sample size necessary for cluster analysis, prior researchers suggested that the  
36 adequate sample size for cluster analysis should be at least  $2^m$  cases, preferably  $5 \times 2^m$  cases,  
37 where  $m$  is the number of clustering variables.<sup>40,43</sup> Since we used 3 variables (i.e. concern beliefs,  
38 necessity beliefs, and illness perceptions) for the clustering analysis, a minimal sample size to  
39  
40  
41  
42  
43  
44  
45  
46  
47  
48  
49  
50  
51  
52  
53  
54  
55  
56  
57  
58  
59  
60

1  
2  
3 include no less than 8 cases, preferably more than 40 cases, is sufficient to perform a cluster  
4 analysis. Additionally, based on an analysis of cluster studies, Dolnicar reports that the median  
5 sample size is 293.<sup>44</sup> In the first step, each data record was either considered as a new cluster or  
6 was added to a previously formed cluster. In the second step, the clusters formed from the first  
7 step were compared and merged based on the distance between them. Then, we assessed the  
8 goodness of fit of the clustering solution. The silhouette measure of cohesion and separation was  
9 used to evaluate the overall goodness-of-fit of the clusters.<sup>45</sup> A silhouette measure varies between  
10 -1 and 1 based on the average distances between the objects. The value of a silhouette measure  
11 less than 0.20 indicates a poor solution quality, a value between 0.20 and 0.50 suggests a fair  
12 solution, whereas a value of more than 0.50 represents a good solution.<sup>46</sup> Once categorized, the  
13 clusters were then characterized based on various sociodemographic and clinical characteristics.  
14 For the continuous variables, one-way ANOVA was used to determine the psychosocial (e.g.  
15 health literacy and self-efficacy), clinical (e.g. number of medicines) and sociodemographic (e.g.  
16 age) factors that varied between the clusters. For the categorical variables such as gender and  
17 race, chi-square tests were used to examine the differences between the clusters. SPSS (IBM  
18 Corp. Released 2015. IBM SPSS Statistics for Windows, Version 23.0. Armonk, NY: IBM Corp.)  
19 was used for all the analyses.

#### 20 21 22 *Patient and Public involvement*

23 No patients were involved in the development of the study design, the research questions, and  
24 outcome measures. The results of the study will be disseminated to study participants through  
25 access to the published article once published in the journal.

## 26 27 28 **Results**

1  
2  
3 One hundred and ninety-nine patients were approached and 174 patients participated (87.4%  
4 response rate). The participant's mean age was 58.74 (SD = 12.84). The majority were female  
5 (57.5%), non-Hispanic white (67.8%) and African American (24.7%). Approximately 62.1% had  
6 completed at least a college or technical degree, and 57.5% had an annual household income of  
7 equal or more than \$20,000. Of the 174 patients, 40.8% had low medication adherence, 35.1%  
8 had medium medication adherence, and 24.1% had high medication adherence.  
9  
10  
11  
12  
13  
14  
15

16  
17 The two-step cluster analysis produced four distinctive clusters categorized as ambivalent,  
18 skeptical, indifferent, and accepting. The characteristics of the clusters based on medication  
19 adherence, beliefs in medicines, illness perceptions, health literacy, self-efficacy, and all  
20 demographics are reported in Table 1. The distribution of participants across the clusters ranged  
21 from 17.2% to 30.5%. The silhouette measure was 0.4, which indicated a satisfactory cluster  
22 quality and the ratio of the largest to smallest cluster was acceptable at 1.77 (Figure 1). As  
23 hypothesized, high concern beliefs were related to high threatening illness perceptions and low  
24 adherence and vice versa. Table 2 describes the distinctive psychosocial and clinical  
25 characteristics of each cluster. The ambivalent cluster (n = 30, 17.2%) included low adherent  
26 patients with high necessity beliefs, high concern beliefs, and high illness perceptions. The  
27 skeptical cluster (n = 53, 30.5%) included low adherent patients with low necessity beliefs, but  
28 high concern beliefs and high illness perceptions. Both the accepting (n = 40, 23.0%) and  
29 indifferent (n = 51, 29.3%) clusters were comprised of patients with high adherence. Significant  
30 differences were found between the ambivalent, skeptical, accepting, and indifferent adherent  
31 clusters based on self-efficacy (p = 0.002), beliefs in medicines (p < 0.001), illness perception  
32 domains [consequence (p < 0.001), personal control (p < 0.001), treatment control (p < 0.001),  
33 identity (p < 0.001), concern (p < 0.001), coherence (p = 0.027), and emotional representations  
34  
35  
36  
37  
38  
39  
40  
41  
42  
43  
44  
45  
46  
47  
48  
49  
50  
51  
52  
53  
54  
55  
56  
57  
58  
59  
60



1  
2  
3 (p < 0.001)], and HbA1c (p < 0.05) (Table 1). While non-adherent clusters had low self-efficacy  
4 and high HbA1c levels, it was vice versa for the adherent clusters. Patients in the ambivalent  
5 non-adherent cluster were younger in age compared to those in the adherent clusters, less likely  
6 to have attended some college or technical school, and likely to be non-white.  
7  
8  
9  
10

## 11 **Discussion**

12  
13  
14 This study used the Extended Self-Regulatory Model to cluster the adherence behavior of  
15 patients with type 2 diabetes based on beliefs in medicines and illness perceptions, as well as  
16 examine the characteristics of the clusters, and the significant differences between them. Four  
17 clusters with distinct beliefs and psychosocial characteristics associated with each group were  
18 formed. The adherence clusters developed in this study by using both beliefs in medicines and  
19 illness perceptions are similar to the clusters formed by Horne et al. in his previous studies where  
20 only beliefs in medicines were used.<sup>19,47</sup> By including illness perceptions and other psychosocial  
21 correlates of adherence, this study identified other pertinent information related to each cluster  
22 that may help in developing guided and targeted interventions for providers working with  
23 patients with diabetes who may be non-adherent.  
24  
25  
26  
27  
28  
29  
30  
31  
32  
33  
34  
35  
36

37  
38 Patients in the ambivalent cluster were the least adherent to their medicines followed by  
39 the skeptical cluster. These clusters together comprised 48% of the whole sample. These results  
40 are similar to previous studies where these specific clusters represent the non-adherent  
41 proportion of a sample.<sup>19,22</sup> Contrary to a prior study, ambivalent patients had the lowest  
42 adherence to diabetes medicines, the strongest concerns about their medicines and the strongest  
43 threatening illness perceptions.<sup>41</sup> In spite of their strong concerns about medicines, ambivalent  
44 patients also perceived that their medications were necessary to maintain their health. Further  
45 analysis revealed that their strong threatening perceptions about diabetes were from their  
46  
47  
48  
49  
50  
51  
52  
53  
54  
55  
56  
57  
58  
59  
60

1  
2  
3 individual illness perception domains including high emotional representations, lack of treatment  
4 control, high concern about illness, and less coherence. Despite the belief that medications are  
5 necessary, patients in the ambivalent cluster may be cognitively and emotionally overwhelmed  
6  
7 by the demands of managing diabetes. Diabetes is psychologically demanding and requires  
8  
9 adaptive self-care tasks related to being chronically ill, including taking medications as  
10  
11 prescribed.<sup>48-50</sup> Because of this, when patients fail to self-manage their disease, it may give rise  
12  
13 to feelings of guilt, frustration, anger, and hopelessness. These negative feelings may foster a  
14  
15 pessimistic attitude towards diabetes, leading to negative beliefs about the illness and medication,  
16  
17 and poor medication adherence.<sup>51</sup>

18  
19  
20  
21  
22  
23  
24  
25  
26  
27  
28  
29  
30  
31  
32  
33  
34  
35  
36  
37  
38  
39  
40  
41  
42  
43  
44  
45  
46  
47  
48  
49  
50  
51  
52  
53  
54  
55  
56  
57  
58  
59  
60  
Ambivalent patients in this study also had the least self-confidence that they could take  
and manage their medications correctly, and had the lowest health literacy scores. These patients  
also took the highest number of medicines, had the highest number of chronic illness, and had  
poor glycemic control (highest HbA1c values). In addition, ambivalent patients were the  
youngest among the four clusters and had the least education, which might account for their  
inadequate health literacy and concerns about illnesses and medicines. Tailored adherence  
interventions aimed at these patients may need to build their self-efficacy and address their low  
health literacy. Prior research shows that by providing information in simple plain language,  
using teach-back techniques, and showing patients how they can be expert self-managers and  
engage in self-monitoring; patients are more likely to feel more in control of their illness, less  
concerned about the illness, and manage their illness more effectively.<sup>52</sup>

In the skeptical cluster, patients had strong concerns about medicines and threatening  
illness perceptions, although not at a pronounced degree as the ambivalent group. They also did  
not think their medications were necessary. Contrary to previous studies in asthma, epilepsy,

1  
2  
3 inflammatory bowel disease, depression, and cardiac disease, where the skeptical groups were  
4 most non-adherent to their medications, the skeptical group of patients with diabetes in this study  
5 did not have the lowest medication adherence.<sup>21,22,41</sup> Though this cluster of patients had  
6 perceptions of strong consequences from the illness, lack of treatment control, high concerns and  
7 emotional representations, were experiencing many symptoms due to diabetes, and were not  
8 confident they could manage their medications; they also had high health literacy and good  
9 understanding of their diabetes. For these patients, it is possible that because they have an  
10 increased ability to search, understand, and process health information; they are engaged in  
11 seeking information to manage their diabetes themselves, perform other diabetes self-  
12 management practices, and therefore do not believe they need medicines. A prior study has  
13 shown that patients with no educational qualifications (possibly tied to health literacy) are likely  
14 to have doubts about their personal need for medicines compared with patients with any formal  
15 educational qualifications.<sup>21</sup> Additionally, their self-perceived better health status may also be  
16 contributing to their perception that medications are not necessary for maintaining their health,  
17 hence, making them skeptical. In spite of their high health literacy, skeptical patients' low self-  
18 efficacy may lead to their poor glycemic control especially as prior studies report the strong  
19 influence of self-efficacy on diabetes control.<sup>53,54</sup> Adherence interventions that target concerns  
20 about medicines and illness, but also aim to motivate patients towards medication use might need  
21 to be developed for these group of patients.

22  
23  
24  
25  
26  
27  
28  
29  
30  
31  
32  
33  
34  
35  
36  
37  
38  
39  
40  
41  
42  
43  
44  
45  
46  
47 Patients in the indifferent and accepting clusters were adherent to their medicines, though  
48 different in their beliefs in medicines. Similar to prior studies, patients in the accepting group  
49 were more likely to be adherent to their medicines.<sup>19,21,22,41</sup> These patients are generally not  
50 concerned about their illness, believe that their medications are necessary and are least concerned  
51  
52  
53  
54  
55  
56  
57  
58  
59  
60

1  
2  
3 about them, feel the most confident that they can take their medications correctly, and have the  
4 ability to process and understand health information. This group of patients, however, still  
5  
6 believe that their diabetes affects their life, and still have some concern about it. The accepting  
7  
8 patients were the oldest in age, the most educated, and have had their diabetes longer compared  
9  
10 to patients in other clusters. Since these patients' HbA1c values still show that their diabetes is  
11  
12 uncontrolled and using medications as part of diabetes management may not be concerning;  
13  
14 interventions may seek to address concerns about their diabetes, especially as it relates to other  
15  
16 complex diabetes self-management issues, such as checking blood sugars, exercising, and diet,  
17  
18 etc. Since these older and well-educated patients have had diabetes for a long time and used  
19  
20 many medications, providers may continue to encourage self-monitoring of symptoms, adverse  
21  
22 drug events, and check for other indicators of poor diabetes outcomes, such as high blood  
23  
24 pressure and high cholesterol.<sup>55</sup>  
25  
26  
27  
28  
29

30  
31 Contrary to previous studies where patients who were in the indifferent cluster were  
32  
33 reported to be non-adherent to their medicines, the current study showed that the patients in this  
34  
35 cluster were adherent to their medicines and their diabetes seemed to be in better control than  
36  
37 patients in the three other clusters.<sup>19,22</sup> Though the patients in the indifferent cluster were the  
38  
39 least likely to believe that their medications were necessary, they were also least concerned about  
40  
41 their medicines, were not threatened by their illness, and were not emotionally affected by it (low  
42  
43 emotional representation). Also, they experienced few symptoms and had the least concern about  
44  
45 their illness. It is also possible that because these patients were taking the lowest number of  
46  
47 medicines and had the lowest number of chronic illness, they were healthier compared to other  
48  
49 patients, and therefore more likely to easily manage their medicines. Providers may continue to  
50  
51  
52  
53  
54  
55  
56  
57  
58  
59  
60

1  
2  
3 address the needs for taking medicines and provide interventions that emphasize the need for  
4  
5 taking medicines.  
6

7  
8 This study has several strengths. Horne et al. (2009) classified patients' adherence  
9  
10 behaviors based on beliefs in medicines using the mid-point score of the Beliefs in Medicines  
11  
12 questionnaire.<sup>19</sup> However, this current study used the clustering technique to allow for algorithm-  
13  
14 based grouping based on both beliefs in medicines and illness perceptions founded on the  
15  
16 Extended Self-Regulatory Model. Prior research has highlighted the importance of content and  
17  
18 theory-driven components to enable replication of successful adherence interventions.<sup>52</sup> While it  
19  
20 is important to address diabetes nonadherence via clinical interventions, we cannot underestimate  
21  
22 the impact of patient psychosocial factors such as their individual perceptions of medication and  
23  
24 illness, self-efficacy, and health literacy in the management of diabetes. Brief, valid, and reliable  
25  
26 questionnaires that can easily quantify these psychosocial factors are available and may be  
27  
28 included in adherence support programs.<sup>21</sup>  
29  
30  
31  
32

33 The study limitations are the use of a convenience sample from two clinics in one state,  
34  
35 hereby limiting the generalizability of the study. The use of a self-reported measure to evaluate  
36  
37 medication adherence, rather than objective measures such as the use of pill counts might lead to  
38  
39 overestimation. However, prior studies show the reliability and validity of self-report adherence  
40  
41 measures.<sup>25,27</sup> Data were collected either before or after patients' medical encounter depending  
42  
43 on the flow of the clinic. The timing of the medical encounter may influence patient responses to  
44  
45 questions about illness and treatment beliefs. This variable was not accounted for in the data  
46  
47 analysis. The concurrent assessment of illness perceptions, beliefs in medicines, and adherence  
48  
49 in a cross-sectional manner is a limitation. A longitudinal study that evaluates changes in beliefs  
50  
51 over time and examines how these changes relate to changes in behavior and outcomes will be  
52  
53  
54  
55  
56  
57  
58  
59  
60

1  
2  
3 considered in the future. Hemoglobin A1c was measured retrospectively. Though we used the  
4 most recent values from patients' medical record which is acceptable by clinical practitioners for  
5 standard diabetes care, this retrospective measurement of HbA1c could have limited our results.  
6  
7  
8  
9  
10 Though the B-IPQ total score categorizes respondents into two categories without taking into  
11 consideration the individual domains of the illness perceptions, this was needed for clustering  
12 their adherence. Once the clusters were formed, the illness perception domain characteristics of  
13  
14  
15  
16  
17 each cluster were analyzed and compared.

## 18 19 **Conclusions**

20  
21 This study used a cluster analysis to characterize patients' adherence behavior based on their  
22 beliefs in both medicines and illnesses and psychosocial factors. Using evidence-based  
23  
24  
25  
26 theoretical approaches, four clusters were formed with characteristics that suggest different types  
27 of interventions for each cluster. Medication nonadherence is a complex behavior to understand,  
28 and targeted interventions are often recommended. Data that can help discriminate between large  
29  
30  
31  
32 groups of non-adherent individuals is needed in developing more personalized interventions.  
33  
34  
35  
36  
37  
38  
39  
40  
41  
42  
43  
44  
45  
46  
47  
48  
49  
50  
51  
52  
53  
54  
55  
56  
57  
58  
59  
60  
61  
62  
63  
64  
65  
66  
67  
68  
69  
70  
71  
72  
73  
74  
75  
76  
77  
78  
79  
80  
81  
82  
83  
84  
85  
86  
87  
88  
89  
90  
91  
92  
93  
94  
95  
96  
97  
98  
99  
100  
101  
102  
103  
104  
105  
106  
107  
108  
109  
110  
111  
112  
113  
114  
115  
116  
117  
118  
119  
120  
121  
122  
123  
124  
125  
126  
127  
128  
129  
130  
131  
132  
133  
134  
135  
136  
137  
138  
139  
140  
141  
142  
143  
144  
145  
146  
147  
148  
149  
150  
151  
152  
153  
154  
155  
156  
157  
158  
159  
160  
161  
162  
163  
164  
165  
166  
167  
168  
169  
170  
171  
172  
173  
174  
175  
176  
177  
178  
179  
180  
181  
182  
183  
184  
185  
186  
187  
188  
189  
190  
191  
192  
193  
194  
195  
196  
197  
198  
199  
200  
201  
202  
203  
204  
205  
206  
207  
208  
209  
210  
211  
212  
213  
214  
215  
216  
217  
218  
219  
220  
221  
222  
223  
224  
225  
226  
227  
228  
229  
230  
231  
232  
233  
234  
235  
236  
237  
238  
239  
240  
241  
242  
243  
244  
245  
246  
247  
248  
249  
250  
251  
252  
253  
254  
255  
256  
257  
258  
259  
260  
261  
262  
263  
264  
265  
266  
267  
268  
269  
270  
271  
272  
273  
274  
275  
276  
277  
278  
279  
280  
281  
282  
283  
284  
285  
286  
287  
288  
289  
290  
291  
292  
293  
294  
295  
296  
297  
298  
299  
300  
301  
302  
303  
304  
305  
306  
307  
308  
309  
310  
311  
312  
313  
314  
315  
316  
317  
318  
319  
320  
321  
322  
323  
324  
325  
326  
327  
328  
329  
330  
331  
332  
333  
334  
335  
336  
337  
338  
339  
340  
341  
342  
343  
344  
345  
346  
347  
348  
349  
350  
351  
352  
353  
354  
355  
356  
357  
358  
359  
360  
361  
362  
363  
364  
365  
366  
367  
368  
369  
370  
371  
372  
373  
374  
375  
376  
377  
378  
379  
380  
381  
382  
383  
384  
385  
386  
387  
388  
389  
390  
391  
392  
393  
394  
395  
396  
397  
398  
399  
400  
401  
402  
403  
404  
405  
406  
407  
408  
409  
410  
411  
412  
413  
414  
415  
416  
417  
418  
419  
420  
421  
422  
423  
424  
425  
426  
427  
428  
429  
430  
431  
432  
433  
434  
435  
436  
437  
438  
439  
440  
441  
442  
443  
444  
445  
446  
447  
448  
449  
450  
451  
452  
453  
454  
455  
456  
457  
458  
459  
460  
461  
462  
463  
464  
465  
466  
467  
468  
469  
470  
471  
472  
473  
474  
475  
476  
477  
478  
479  
480  
481  
482  
483  
484  
485  
486  
487  
488  
489  
490  
491  
492  
493  
494  
495  
496  
497  
498  
499  
500  
501  
502  
503  
504  
505  
506  
507  
508  
509  
510  
511  
512  
513  
514  
515  
516  
517  
518  
519  
520  
521  
522  
523  
524  
525  
526  
527  
528  
529  
530  
531  
532  
533  
534  
535  
536  
537  
538  
539  
540  
541  
542  
543  
544  
545  
546  
547  
548  
549  
550  
551  
552  
553  
554  
555  
556  
557  
558  
559  
560  
561  
562  
563  
564  
565  
566  
567  
568  
569  
570  
571  
572  
573  
574  
575  
576  
577  
578  
579  
580  
581  
582  
583  
584  
585  
586  
587  
588  
589  
590  
591  
592  
593  
594  
595  
596  
597  
598  
599  
600  
601  
602  
603  
604  
605  
606  
607  
608  
609  
610  
611  
612  
613  
614  
615  
616  
617  
618  
619  
620  
621  
622  
623  
624  
625  
626  
627  
628  
629  
630  
631  
632  
633  
634  
635  
636  
637  
638  
639  
640  
641  
642  
643  
644  
645  
646  
647  
648  
649  
650  
651  
652  
653  
654  
655  
656  
657  
658  
659  
660  
661  
662  
663  
664  
665  
666  
667  
668  
669  
670  
671  
672  
673  
674  
675  
676  
677  
678  
679  
680  
681  
682  
683  
684  
685  
686  
687  
688  
689  
690  
691  
692  
693  
694  
695  
696  
697  
698  
699  
700  
701  
702  
703  
704  
705  
706  
707  
708  
709  
710  
711  
712  
713  
714  
715  
716  
717  
718  
719  
720  
721  
722  
723  
724  
725  
726  
727  
728  
729  
730  
731  
732  
733  
734  
735  
736  
737  
738  
739  
740  
741  
742  
743  
744  
745  
746  
747  
748  
749  
750  
751  
752  
753  
754  
755  
756  
757  
758  
759  
760  
761  
762  
763  
764  
765  
766  
767  
768  
769  
770  
771  
772  
773  
774  
775  
776  
777  
778  
779  
780  
781  
782  
783  
784  
785  
786  
787  
788  
789  
790  
791  
792  
793  
794  
795  
796  
797  
798  
799  
800  
801  
802  
803  
804  
805  
806  
807  
808  
809  
810  
811  
812  
813  
814  
815  
816  
817  
818  
819  
820  
821  
822  
823  
824  
825  
826  
827  
828  
829  
830  
831  
832  
833  
834  
835  
836  
837  
838  
839  
840  
841  
842  
843  
844  
845  
846  
847  
848  
849  
850  
851  
852  
853  
854  
855  
856  
857  
858  
859  
860  
861  
862  
863  
864  
865  
866  
867  
868  
869  
870  
871  
872  
873  
874  
875  
876  
877  
878  
879  
880  
881  
882  
883  
884  
885  
886  
887  
888  
889  
890  
891  
892  
893  
894  
895  
896  
897  
898  
899  
900  
901  
902  
903  
904  
905  
906  
907  
908  
909  
910  
911  
912  
913  
914  
915  
916  
917  
918  
919  
920  
921  
922  
923  
924  
925  
926  
927  
928  
929  
930  
931  
932  
933  
934  
935  
936  
937  
938  
939  
940  
941  
942  
943  
944  
945  
946  
947  
948  
949  
950  
951  
952  
953  
954  
955  
956  
957  
958  
959  
960  
961  
962  
963  
964  
965  
966  
967  
968  
969  
970  
971  
972  
973  
974  
975  
976  
977  
978  
979  
980  
981  
982  
983  
984  
985  
986  
987  
988  
989  
990  
991  
992  
993  
994  
995  
996  
997  
998  
999  
1000

## References

1. Hu D, Juarez DT, Yeboah M, Castillo TP. Interventions to increase medication adherence in African-American and Latino populations: a literature review. *Hawaii J Med Public Health*. 2014;73(1):11-18.
2. Haynes RB, Taylor DW, Sackett DL. Compliance in health care. 1979.
3. Leventhal H, Nerenz DR, Purse J. *Illness representations and coping with health threats*. 1984.
4. Kelly JA, Kalichman SC. Behavioral research in HIV/AIDS primary and secondary prevention: recent advances and future directions. *J Consult Clin Psychol*. 2002;70(3):626-639.
5. Agency for Healthcare Research and Quality. Better adherence to diabetes medications means fewer hospitalizations and emergency department visits. 2011; <https://archive.ahrq.gov/news/newsletters/research-activities/mar11/0311RA8.html>. Accessed March 13, 2018.
6. Haynes RB, Ackloo E, Sahota N, McDonald HP, Yao X. Interventions for enhancing medication adherence. *Cochrane Database Syst Rev*. 2008(2):CD000011.
7. Balkrishnan R, Rajagopalan R, Camacho FT, Huston SA, Murray FT, Anderson RT. Predictors of medication adherence and associated health care costs in an older population with type 2 diabetes mellitus: a longitudinal cohort study. *Clin Ther*. 2003;25(11):2958-2971.
8. Gonzalez JS, Tanenbaum ML, Commissariat PV. Psychosocial factors in medication adherence and diabetes self-management: Implications for research and practice. *Am Psychol*. 2016;71(7):539-551.

- 1  
2  
3 9. Horne R, Weinman J. Self-regulation and self-management in asthma: exploring the role  
4 of illness perceptions and treatment beliefs in explaining non-adherence to preventer  
5 medication. *Psychology and Health*. 2002;17(1):17-32.  
6  
7
- 8  
9  
10 10. Horne R. *Representations of medication and treatment: advances in theory and*  
11 *measurement*. London: Harwood Academic; 1997.  
12  
13
- 14  
15 11. Horne R. Treatment perceptions and self-regulation. *The self-regulation of health and*  
16 *illness behaviour*. 1 edition ed: Routledge; 2003:138-153.  
17  
18
- 19  
20 12. Broadbent E, Donkin L, Stroh JC. Illness and treatment perceptions are associated with  
21 adherence to medications, diet, and exercise in diabetic patients. *Diabetes Care*.  
22  
23 2011;34(2):338-340.  
24  
25
- 26  
27 13. Shiyanbola OO, Nelson J. Illness perceptions, beliefs in medicine and medication non-  
28 adherence among South Dakota minority women with diabetes: a pilot study. *S D Med*.  
29  
30 2011;64(10):365-368.  
31  
32
- 33  
34 14. Gunther M, Foisy M, Houston S, Guirguis L, Hughes C. Treatment beliefs, illness  
35 perceptions, and non-adherence to antiretroviral therapy in an ethnically diverse patient  
36 population. *Int J Clin Pharm*. 2014;36(1):105-111.  
37  
38
- 39  
40 15. Unni EJ, Shiyanbola O, Farris KB. Medication adherence: a complex behavior of  
41 medication and illness beliefs. *Aging Health*. 2013;9(4):377-387.  
42  
43
- 44  
45 16. Leventhal H, Brissette I, Leventhal EA. The common-sense model of self-regulation of  
46 health and illness. *The self-regulation of health and illness behaviour*. 2003;1:42-65.  
47  
48
- 49  
50 17. Phillips LA, Leventhal EA, Leventhal H. Factors associated with the accuracy of  
51 physicians' predictions of patient adherence. *Patient Educ Couns*. 2011;85(3):461-467.  
52  
53  
54  
55  
56  
57  
58  
59  
60



- 1  
2  
3 18. Phillips LA, Leventhal H, Leventhal EA. Physicians' communication of the common-  
4 sense self-regulation model results in greater reported adherence than physicians' use of  
5 interpersonal skills. *Br J Health Psychol.* 2012;17(2):244-257.  
6  
7
- 8  
9  
10 19. Horne R, Parham R, Driscoll R, Robinson A. Patients' attitudes to medicines and  
11 adherence to maintenance treatment in inflammatory bowel disease. *Inflammatory bowel*  
12 *diseases.* 2009;15(6):837-844.  
13  
14
- 15  
16  
17 20. Smithson WH, Hukins D, Colwell B, Mathers N. Developing a method to identify  
18 medicines non-adherence in a community sample of adults with epilepsy. *Epilepsy &*  
19 *Behavior.* 2012;24(1):49-53.  
20  
21
- 22  
23  
24 21. Chapman SCE, Horne R, Chater A, Hukins D, Smithson WH. Patients' perspectives on  
25 antiepileptic medication: relationships between beliefs about medicines and adherence  
26 among patients with epilepsy in UK primary care. *Epilepsy & Behavior.* 2014;31:312-  
27 320.  
28  
29
- 30  
31  
32  
33 22. Unni E, Shiyabola OO. Clustering medication adherence behavior based on beliefs in  
34 medicines and illness perceptions in patients taking asthma maintenance medications.  
35 *Curr Med Res Opin.* 2016;32(1):113-121.  
36  
37
- 38  
39  
40 23. Feldman BS, Cohen-Stavi CJ, Leibowitz M, et al. Defining the role of medication  
41 adherence in poor glycemic control among a general adult population with diabetes.  
42 *PLoS One.* 2014;9(9):e108145.  
43  
44
- 45  
46  
47 24. Iuga AO, McGuire MJ. Adherence and health care costs. *Risk Manag Healthc Policy.*  
48 2014;7:35-44.  
49  
50  
51  
52  
53  
54  
55  
56  
57  
58  
59  
60

- 1  
2  
3 25. Morisky DE, Ang A, Krousel-Wood M, Ward HJ. Predictive validity of a medication  
4 adherence measure in an outpatient setting. *J Clin Hypertens (Greenwich)*.  
5  
6 2008;10(5):348-354.  
7  
8  
9  
10 26. Sakthong P, Chabunthom R, Charoenvisuthiwongs R. Psychometric properties of the  
11 Thai version of the 8-item Morisky Medication Adherence Scale in patients with type 2  
12 diabetes. *Ann Pharmacother*. 2009;43(5):950-957.  
13  
14  
15  
16  
17 27. Krousel-Wood M, Islam T, Webber LS, Re RN, Morisky DE, Muntner P. New  
18 medication adherence scale versus pharmacy fill rates in seniors with hypertension. *Am J*  
19 *Manag Care*. 2009;15(1):59-66.  
20  
21  
22  
23  
24 28. Al-Qazaz H, Hassali MA, Shafie AA, Sulaiman SA, Sundram S, Morisky DE. The eight-  
25 item Morisky Medication Adherence Scale MMAS: translation and validation of the  
26 Malaysian version. *Diabetes Res Clin Pract*. 2010;90(2):216-221.  
27  
28  
29  
30  
31 29. Morisky DE, DiMatteo MR. Improving the measurement of self-reported medication  
32 nonadherence: response to authors. *J Clin Epidemiol*. 2011;64(3):255-257; discussion  
33 258-263.  
34  
35  
36  
37  
38 30. Horne R, Weinman J, Hankins M. The beliefs about medicines questionnaire: the  
39 development and evaluation of a new method for assessing the cognitive representation  
40 of medication. *Psychology and health*. 1999;14(1):1-24.  
41  
42  
43  
44  
45 31. Broadbent E, Petrie KJ, Main J, Weinman J. The brief illness perception questionnaire. *J*  
46 *Psychosom Res*. 2006;60(6):631-637.  
47  
48  
49  
50 32. Weiss BD, Mays MZ, Martz W, et al. Quick assessment of literacy in primary care: the  
51 newest vital sign. *Ann Fam Med*. 2005;3(6):514-522.  
52  
53  
54  
55  
56  
57  
58  
59  
60

- 1
- 2
- 3 33. Shigaki C, Kruse RL, Mehr D, et al. Motivation and diabetes self-management. *Chronic*
- 4
- 5 *Illn.* 2010;6(3):202-214.
- 6
- 7
- 8 34. Kirk JK, Grzywacz JG, Arcury TA, et al. Performance of health literacy tests among
- 9
- 10 older adults with diabetes. *Journal of general internal medicine.* 2012;27(5):534-540.
- 11
- 12 35. Haun JN, Valerio MA, McCormack LA, Sorensen K, Paasche-Orlow MK. Health literacy
- 13
- 14 measurement: an inventory and descriptive summary of 51 instruments. *J Health*
- 15
- 16 *Commun.* 2014;19 Suppl 2:302-333.
- 17
- 18
- 19 36. Huang YM, Shiyanbola OO, Smith PD, Chan HY. Quick screen of patients' numeracy
- 20
- 21 and document literacy skills: the factor structure of the Newest Vital Sign. *Patient Prefer*
- 22
- 23 *Adherence.* 2018;12:853-859.
- 24
- 25
- 26 37. Risser J, Jacobson TA, Kripalani S. Development and psychometric evaluation of the
- 27
- 28 Self-efficacy for Appropriate Medication Use Scale (SEAMS) in low-literacy patients
- 29
- 30 with chronic disease. *J Nurs Meas.* 2007;15(3):203-219.
- 31
- 32
- 33 38. Lavsa SM, Holzworth A, Ansani NT. Selection of a validated scale for measuring
- 34
- 35 medication adherence. *J Am Pharm Assoc (2003).* 2011;51(1):90-94.
- 36
- 37
- 38 39. American Diabetes Association. Standards of medical care in diabetes—2017 abridged
- 39
- 40 for primary care providers. *Clinical Diabetes.* 2017;35(1):5-26.
- 41
- 42 40. Sarstedt M, Mooi E. Cluster analysis. *A concise guide to market research:* Springer;
- 43
- 44 2014:273-324.
- 45
- 46
- 47 41. Tibaldi G, Clatworthy J, Torchio E, Argentero P, Munizza C, Horne R. The utility of the
- 48
- 49 Necessity--Concerns Framework in explaining treatment non-adherence in four chronic
- 50
- 51 illness groups in Italy. *Chronic Illn.* 2009;5(2):129-133.
- 52
- 53
- 54
- 55
- 56
- 57
- 58
- 59
- 60

- 1  
2  
3 42. Chapman SCE, Horne R, Eade R, Balestrini S, Rush J, Sisodiya SM. Applying a  
4 perceptions and practicalities approach to understanding nonadherence to antiepileptic  
5 drugs. *Epilepsia*. 2015;56(9):1398-1407.  
6  
7  
8  
9  
10 43. Formann AK. *Die latent-class-analyse: Einführung in Theorie und Anwendung*. Beltz;  
11 1984.  
12  
13  
14 44. Dolnicar S. A review of unquestioned standards in using cluster analysis for data-driven  
15 market segmentation. 2002.  
16  
17  
18  
19 45. Rousseeuw PJ. Silhouettes: a graphical aid to the interpretation and validation of cluster  
20 analysis. *Journal of computational and applied mathematics*. 1987;20:53-65.  
21  
22  
23  
24 46. Mooi E, Sarstedt M. Cluster analysis. *A concise guide to market research*: Springer;  
25 2010:237-284.  
26  
27  
28 47. Horne R, Chapman SC, Parham R, Freemantle N, Forbes A, Cooper V. Understanding  
29 patients' adherence-related beliefs about medicines prescribed for long-term conditions: a  
30 meta-analytic review of the Necessity-Concerns Framework. *PloS one*.  
31 2013;8(12):e80633.  
32  
33  
34  
35 48. Snoek FJ, Pouwer F, Welch GW, Polonsky WH. Diabetes-related emotional distress in  
36 Dutch and U.S. diabetic patients: cross-cultural validity of the problem areas in diabetes  
37 scale. *Diabetes Care*. 2000;23(9):1305-1309.  
38  
39  
40  
41  
42 49. Rubin RR. Adherence to pharmacologic therapy in patients with type 2 diabetes mellitus.  
43 *Am J Med*. 2005;118 Suppl 5A:27S-34S.  
44  
45  
46  
47  
48  
49 50. Samson A, Siam H. Adapting to major chronic illness: a proposal for a comprehensive  
50 task-model approach. *Patient Educ Couns*. 2008;70(3):426-429.  
51  
52  
53  
54  
55  
56  
57  
58  
59  
60

- 1  
2  
3 51. Van der Ven N, Weinger K, Snoek F. Cognitive behaviour therapy: how to improve  
4 diabetes self-management. *Diabetes voice*. 2002;47(3):10-13.  
5  
6  
7  
8 52. Clarkesmith DE, Pattison HM, Borg Xuereb C, Lane DA. Developing a Complex  
9 Educational–Behavioural Intervention: The TREAT Intervention for Patients with Atrial  
10 Fibrillation. Paper presented at: Healthcare 2016.  
11  
12  
13  
14 53. McCleary-Jones V. Health literacy and its association with diabetes knowledge, self-  
15 efficacy and disease self-management among African Americans with diabetes mellitus.  
16  
17 *ABNF Journal*. 2011;22(2).  
18  
19  
20  
21 54. Sleath B, Carpenter DM, Blalock SJ, et al. Development of a new diabetes medication  
22 self-efficacy scale and its association with both reported problems in using diabetes  
23 medications and self-reported adherence. *Patient Prefer Adherence*. 2016;10:1003-1010.  
24  
25  
26  
27  
28 55. Benoit SR, Fleming R, Philis-Tsimikas A, Ji M. Predictors of glycemic control among  
29 patients with Type 2 diabetes: a longitudinal study. *BMC Public Health*. 2005;5(1):36.  
30  
31  
32  
33  
34  
35  
36  
37  
38  
39  
40  
41  
42  
43  
44  
45  
46  
47  
48  
49  
50  
51  
52  
53  
54  
55  
56  
57  
58  
59  
60

Table 1 Mean score and percentage comparison of adherence, psychosocial factors, and demographics between clusters (n=174)

| Variables                                              | Total         | Cluster 1<br>(Ambivalent)       | Cluster 2<br>(Skeptical)        | Cluster 3<br>(Indifferent)      | Cluster 4<br>(Accepting)        |
|--------------------------------------------------------|---------------|---------------------------------|---------------------------------|---------------------------------|---------------------------------|
| Number of subjects                                     | 174           | 30 (17.2%)                      | 53 (30.5%)                      | 51 (29.3%)                      | 40 (23.0%)                      |
| Medication adherence <sup>a, ***</sup>                 | 5.87 ± 1.87   | 4.87 ± 1.78 <sup>g, h</sup>     | 5.43 ± 1.89 <sup>j</sup>        | 6.39 ± 1.67 <sup>g</sup>        | 6.53 ± 1.72 <sup>h, j</sup>     |
| Necessity beliefs (Mean ± SD) <sup>***</sup>           | 18.88 ± 4.27  | 21.93 ± 2.77 <sup>f, g</sup>    | 18.23 ± 1.76 <sup>f, i, j</sup> | 14.59 ± 3.71 <sup>g, i</sup>    | 22.93 ± 2.18 <sup>j</sup>       |
| Concern beliefs (Mean ± SD) <sup>***</sup>             | 13.24 ± 4.35  | 18.83 ± 3.66 <sup>f, g, h</sup> | 14.85 ± 2.07 <sup>f, i, j</sup> | 11.12 ± 2.71 <sup>g, i</sup>    | 9.60 ± 3.41 <sup>h, j</sup>     |
| Illness perceptions (IP) (Mean ± SD) <sup>b, ***</sup> | 37.13 ± 11.06 | 48.33 ± 8.39 <sup>f, g, h</sup> | 41.72 ± 6.23 <sup>f, i, j</sup> | 27.63 ± 9.87 <sup>g, i, k</sup> | 34.78 ± 8.07 <sup>h, j, k</sup> |
| Consequence IP <sup>b, ***</sup>                       | 4.88 ± 2.91   | 7.30 ± 2.55 <sup>f, g, h</sup>  | 5.13 ± 2.43 <sup>f, i</sup>     | 2.94 ± 2.60 <sup>g, i, k</sup>  | 5.20 ± 2.55 <sup>h, k</sup>     |
| Timeline IP <sup>b</sup>                               | 8.20 ± 2.44   | 8.07 ± 2.49                     | 8.51 ± 1.85                     | 7.53 ± 2.98                     | 8.73 ± 2.18                     |
| Personal control IP <sup>b</sup>                       | 3.53 ± 2.51   | 3.73 ± 3.06                     | 4.13 ± 2.31                     | 3.20 ± 2.40                     | 3.00 ± 2.33                     |
| Treatment control IP <sup>b, ***</sup>                 | 1.93 ± 2.03   | 2.57 ± 2.54 <sup>h</sup>        | 2.57 ± 1.82 <sup>j</sup>        | 1.75 ± 2.01                     | 0.83 ± 1.34 <sup>h, j</sup>     |
| Identity IP <sup>b, ***</sup>                          | 4.51 ± 2.91   | 7.17 ± 2.30 <sup>f, g, h</sup>  | 5.17 ± 2.41 <sup>f, i, j</sup>  | 2.35 ± 2.50 <sup>g, i</sup>     | 4.40 ± 2.43 <sup>h, j</sup>     |
| Concern IP <sup>b, ***</sup>                           | 6.85 ± 2.82   | 8.63 ± 2.09 <sup>g</sup>        | 7.38 ± 2.11 <sup>i</sup>        | 4.98 ± 3.22 <sup>g, i, k</sup>  | 7.20 ± 2.31 <sup>k</sup>        |
| Coherence IP <sup>b, *</sup>                           | 2.79 ± 2.52   | 3.53 ± 3.56                     | 3.15 ± 1.91 <sup>j</sup>        | 2.69 ± 2.65                     | 1.88 ± 1.84 <sup>j</sup>        |
| Emotional representation IP <sup>b, ***</sup>          | 4.45 ± 3.32   | 7.33 ± 2.71 <sup>g, h</sup>     | 5.68 ± 2.56 <sup>i, j</sup>     | 2.20 ± 2.99 <sup>g, i</sup>     | 3.55 ± 2.72 <sup>h, j</sup>     |

1  
2  
3  
4  
5  
6  
7  
8  
9  
10  
11  
12  
13  
14  
15  
16  
17  
18  
19  
20  
21  
22  
23  
24  
25  
26  
27  
28  
29  
30  
31  
32  
33  
34  
35  
36  
37  
38  
39  
40  
41  
42  
43  
44  
45  
46  
47

|                                            |               |                              |                           |               |                              |
|--------------------------------------------|---------------|------------------------------|---------------------------|---------------|------------------------------|
| Self-efficacy (Mean ± SD) <sup>c, **</sup> | 33.24 ± 5.96  | 31.30 ± 6.65 <sup>h, j</sup> | 32.02 ± 6.18 <sup>l</sup> | 33.47 ± 6.11  | 36.00 ± 3.64 <sup>h, j</sup> |
| Health literacy (Mean ± SD) <sup>d</sup>   | 3.72 ± 2.02   | 3.13 ± 1.94                  | 3.96 ± 1.91               | 3.80 ± 2.11   | 3.75 ± 2.08                  |
| Inadequate                                 |               | 7 (23.3%)                    | 7 (13.2%)                 | 7 (17.5%)     | 10 (19.6%)                   |
| Marginal                                   |               | 11 (36.7%)                   | 10 (18.9%)                | 9 (22.5%)     | 9 (17.6%)                    |
| Adequate                                   |               | 12 (40.0%)                   | 36 (67.9%)                | 24 (60%)      | 32 (62.7%)                   |
| Age                                        | 58.74 ± 12.84 | 55.17 ± 14.00                | 57.85 ± 11.48             | 59.04 ± 13.92 | 62.20 ± 11.73                |
| White <sup>**</sup>                        | 118 (67.8%)   | 12 (40.0%)                   | 38 (71.7%)                | 29 (72.5%)    | 39 (76.5%)                   |
| Female                                     | 100 (57.5%)   | 18 (60.0%)                   | 30 (56.6%)                | 20 (50.0%)    | 32 (62.7%)                   |
| Education higher than high school          | 108 (62.1%)   | 15 (50.0%)                   | 32 (60.4%)                | 35 (68.6%)    | 26 (65.0%)                   |
| Education                                  |               |                              |                           |               |                              |
| Completed 8 <sup>th</sup> grade or less    | 4 (2.3%)      | 1 (3.3%)                     | 0 (0.0%)                  | 1 (2.0%)      | 2 (5.0%)                     |
| Some high school                           | 15 (8.6%)     | 5 (16.7%)                    | 3 (5.7%)                  | 5 (9.8%)      | 2 (5.0%)                     |
| High school graduate or GED                | 47 (27.0%)    | 9 (30.0%)                    | 18 (34.0%)                | 10 (19.6%)    | 10 (25.0%)                   |
| Some college or technical school           | 67 (38.5%)    | 10 (33.3%)                   | 14 (26.4%)                | 26 (51.0%)    | 17 (42.5%)                   |
| College graduate                           | 24 (13.8%)    | 3 (10.0%)                    | 12 (22.6%)                | 6 (11.8%)     | 3 (7.5%)                     |
| Graduate degree                            | 17 (9.8%)     | 2 (6.7%)                     | 6 (11.3%)                 | 3 (5.9%)      | 6 (15.0%)                    |

|                                                             |                 |                                 |                              |                                    |                               |
|-------------------------------------------------------------|-----------------|---------------------------------|------------------------------|------------------------------------|-------------------------------|
| Number of medications (Mean $\pm$ SD) <sup>***</sup>        | 7.77 $\pm$ 3.89 | 9.07 $\pm$ 4.21 <sup>g</sup>    | 8.19 $\pm$ 4.03 <sup>l</sup> | 5.80 $\pm$ 2.86 <sup>g, l, k</sup> | 8.75 $\pm$ 3.75 <sup>k</sup>  |
| Number of illness (Mean $\pm$ SD) <sup>**</sup>             | 3.86 $\pm$ 1.82 | 4.50 $\pm$ 2.03 <sup>g</sup>    | 3.89 $\pm$ 1.96              | 3.22 $\pm$ 1.47 <sup>g, k</sup>    | 4.28 $\pm$ 1.66 <sup>k</sup>  |
| Duration of diabetes diagnosed (Mean $\pm$ SD) <sup>*</sup> | 9.58 $\pm$ 7.08 | 8.75 $\pm$ 5.79                 | 9.25 $\pm$ 6.30              | 8.03 $\pm$ 7.14 <sup>k</sup>       | 12.61 $\pm$ 8.13 <sup>k</sup> |
| HbA1c level <sup>*</sup>                                    | 7.66 $\pm$ 1.64 | 8.31 $\pm$ 2.14 <sup>g</sup>    | 7.86 $\pm$ 1.58              | 7.17 $\pm$ 1.32 <sup>g</sup>       | 7.52 $\pm$ 1.51               |
| Health status <sup>e, **</sup>                              | 2.64 $\pm$ 0.80 | 2.13 $\pm$ 0.90 <sup>f, g</sup> | 2.72 $\pm$ 0.77 <sup>f</sup> | 2.86 $\pm$ 0.75 <sup>g</sup>       | 2.65 $\pm$ 0.70               |

<sup>a</sup> Self-reported medication adherence was measured with the 8-item Morisky Medication Adherence Scale. Use of the ©MMAS is protected by US Copyright laws. Permission for use is required. A license agreement is available from: Donald E. Morisky, MMAS Research LLC 14725 NE 20th St. Bellevue WA 98007 or from dmorisky@gmail.com.

<sup>b</sup> Higher scores indicate higher specific illness perceptions. Personal control, treatment control, and coherence are reverse scored.

<sup>c</sup> Higher scores indicate higher levels of self-efficacy.

<sup>d</sup> Health literacy was measured with the Newest Vital Sign (NVS).

<sup>e</sup> One item on a 5 point scale. Higher scores indicate better self-reported health status.

<sup>f-k</sup> Significant differences based on the post-hoc analysis.

\*  $p < 0.05$ , \*\*  $p < 0.01$ , \*\*\*  $p < 0.001$



Table 2 Beliefs, psychosocial and clinical characteristics of the clusters

|                            | <b>Clusters with non-adherence behavior</b> |                                  | <b>Clusters with adherence behavior</b> |                                  |
|----------------------------|---------------------------------------------|----------------------------------|-----------------------------------------|----------------------------------|
|                            | <b>Cluster 1<br/>(Ambivalent)</b>           | <b>Cluster 2<br/>(Skeptical)</b> | <b>Cluster 3<br/>(Indifferent)</b>      | <b>Cluster 4<br/>(Accepting)</b> |
| Medication Adherence       | Low adherence                               | Low adherence                    | High adherence                          | High adherence                   |
| Beliefs in medicines       | High NB                                     | Low NB                           | Low NB                                  | High NB                          |
|                            | High CB                                     | High CB                          | Low CB                                  | Low CB                           |
| Illness perceptions        | High IP                                     | High IP                          | Low IP                                  | Low IP                           |
| Self-efficacy              | Low SE                                      | Low SE                           | High SE                                 | High SE                          |
| Health literacy            | Low HL                                      | High HL                          | High HL                                 | High HL                          |
| Glycemic control           | High HbA1c                                  | High HbA1c                       | Low HbA1c                               | Low HbA1c                        |
| Illness perception domains | High Consequence                            | High Consequence                 | Low consequence                         | High consequence                 |
|                            | High treatment control                      | High treatment control           | Low treatment control                   | Low treatment control            |
|                            | High identity                               | High identity                    | Low identity                            | Low identity                     |
|                            | High concern                                | High concern                     | Low concern                             | High concern                     |
|                            | High coherence                              | High coherence                   | Low coherence                           | Low coherence                    |

---

|                                  |                                  |                                 |                                 |
|----------------------------------|----------------------------------|---------------------------------|---------------------------------|
| High emotional<br>representation | High emotional<br>representation | Low emotional<br>representation | Low emotional<br>representation |
|----------------------------------|----------------------------------|---------------------------------|---------------------------------|

---

1  
2  
3  
4  
5  
6  
7  
8  
9  
10  
11 The high and low values for each variable is compared based on the mean values from all  
12 participants.  
13

14  
15 CB: concern beliefs; HbA1c: hemoglobin A1c levels; HL: health literacy; IP: illness perceptions;  
16

17 NB: necessity beliefs; SE: self-efficacy.  
18  
19  
20  
21  
22  
23  
24  
25  
26  
27  
28  
29  
30  
31  
32  
33  
34  
35  
36  
37  
38  
39  
40  
41  
42  
43  
44  
45  
46  
47  
48  
49  
50  
51  
52  
53  
54  
55  
56  
57  
58  
59  
60

1  
2  
3  
4  
5  
6  
7  
8  
9  
10  
11  
12  
13  
14  
15  
16  
17  
18  
19  
20  
21  
22  
23  
24  
25  
26  
27  
28  
29  
30  
31  
32  
33  
34  
35  
36  
37  
38  
39  
40  
41  
42  
43  
44  
45  
46  
47  
48  
49  
50  
51  
52  
53  
54  
55  
56  
57  
58  
59  
60

Figure 1 Test statistics of clustering analysis

For peer review only

Figure Test statistics of cluster analysis

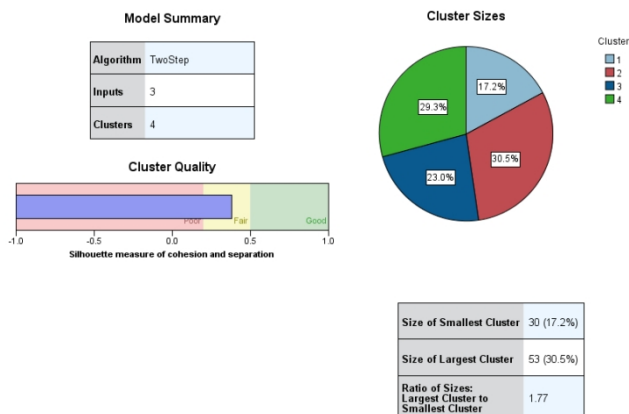

338x190mm (96 x 96 DPI)
